# Supplementary material for: Stochastic process drives the dissimilarity in biodiversity patterns between Pinus kwangtungensis coniferous forest and evergreen deciduous broad-leaved mixed forest in karst area
Source: PeerJ. 2024 Aug 30;12:e17899. doi: 10.7717/peerj.17899 (PMC11368079; doi:10.7717/peerj.17899)
Supplement: File S1 [file peerj-12-17899-s001.xlsx]

## Sheet: Supplementary file 1
Types	Plot	Family	Genus	Species	DBH(cm)	height(m)
CF	1	Fagaceae	Cyclobalanopsis	glauca	9.5	8
CF	1	Fagaceae	Cyclobalanopsis	glauca	9	5.5
CF	1	Fagaceae	Cyclobalanopsis	glauca	6	7
CF	1	Fagaceae	Cyclobalanopsis	glauca	5.5	5
CF	1	Pinaceae	Pinus	kwangtungensis	35	12
CF	1	Sapindaceae	Boniodendron	minius	8.8	12
CF	1	Juglandaceae	Platycarya	strobilacea	7.9	8
CF	1	Cannabaceae	Celtis	sinensis	7	12.5
CF	1	Fagaceae	Cyclobalanopsis	glauca	5	7.5
CF	1	Pinaceae	Pinus	kwangtungensis	26.3	9.5
CF	1	Pinaceae	Pinus	kwangtungensis	25.5	13
CF	1	Pinaceae	Pinus	kwangtungensis	29.5	13.5
CF	1	Pinaceae	Pinus	kwangtungensis	46	13.5
CF	1	Pinaceae	Pinus	kwangtungensis	39	12
CF	1	Pinaceae	Pinus	kwangtungensis	26.4	12.5
CF	1	Pinaceae	Pinus	kwangtungensis	48.5	14
CF	1	Pinaceae	Pinus	kwangtungensis	34.8	13.5
CF	1	Pinaceae	Pinus	kwangtungensis	35.9	9.5
CF	1	Pinaceae	Pinus	massoniana	8.9	5.5
CF	1	Pinaceae	Pinus	kwangtungensis	44.5	11
CF	1	Pinaceae	Pinus	kwangtungensis	17.3	7.5
CF	1	Pinaceae	Pinus	kwangtungensis	29.8	9
CF	1	Pinaceae	Pinus	kwangtungensis	33.5	11
CF	1	Rutaceae	Clausena	dunniana	5.8	5
CF	1	Betulaceae	Carpinus	lipoensis	5.5	6.5
CF	1	Betulaceae	Carpinus	lipoensis	5.9	6.5
CF	1	Pinaceae	Pinus	kwangtungensis	13.9	8.5
CF	1	Pinaceae	Pinus	kwangtungensis	38.5	9.5
CF	1	Pinaceae	Pinus	kwangtungensis	5.3	5
CF	1	Betulaceae	Carpinus	lipoensis	6	6.5
CF	1	Betulaceae	Carpinus	lipoensis	6.4	6.5
CF	1	Cannabaceae	Celtis	sinensis	5.5	7
CF	1	Pinaceae	Pinus	kwangtungensis	34.1	12
CF	1	Pinaceae	Pinus	kwangtungensis	29.2	9.5
CF	1	Pinaceae	Pinus	kwangtungensis	32.5	9.5
CF	1	Pinaceae	Pinus	kwangtungensis	28.8	10
CF	1	Pinaceae	Pinus	kwangtungensis	36.1	9
CF	1	Cannabaceae	Celtis	sinensis	7.8	8.5
CF	1	Cannabaceae	Celtis	sinensis	7.6	7.5
CF	1	Juglandaceae	Platycarya	strobilacea	6.2	7.5
CF	1	Juglandaceae	Platycarya	strobilacea	7.2	6
CF	1	Betulaceae	Carpinus	lipoensis	5.5	3.5
CF	1	Fagaceae	Quercus	phillyreoides	6	4.5
CF	1	Betulaceae	Carpinus	lipoensis	6.5	4.5
CF	1	Juglandaceae	Platycarya	strobilacea	6.8	6.5
CF	1	Simaroubaceae	Picrasma	quassioides	5.5	7
CF	1	Fagaceae	Quercus	phillyreoides	6.8	5.2
CF	1	Fagaceae	Quercus	phillyreoides	6	5.5
CF	1	Betulaceae	Carpinus	lipoensis	5.3	5
CF	1	Fagaceae	Cyclobalanopsis	glauca	5	6
CF	1	Betulaceae	Carpinus	lipoensis	5.3	5.2
CF	1	Betulaceae	Carpinus	lipoensis	5.7	5.1
CF	1	Sapindaceae	Acer	sycopseoides	5.7	6.5
CF	1	Sapindaceae	Acer	sycopseoides	5.6	6
CF	1	Rutaceae	Clausena	dunniana	5.6	5.5
CF	1	Fagaceae	Quercus	phillyreoides	5.3	5
CF	1	Juglandaceae	Platycarya	strobilacea	10.9	6.5
CF	1	Pinaceae	Pinus	kwangtungensis	30	8.5
CF	1	Pinaceae	Pinus	kwangtungensis	23.7	9
CF	1	Pinaceae	Pinus	kwangtungensis	34	12
CF	1	Pinaceae	Pinus	kwangtungensis	21.6	9
CF	1	Pinaceae	Pinus	kwangtungensis	36.8	11
CF	1	Pinaceae	Pinus	kwangtungensis	29	12.5
CF	1	Fagaceae	Cyclobalanopsis	glauca	5	4.5
CF	1	Juglandaceae	Platycarya	strobilacea	10.5	7.5
CF	1	Lauraceae	Machilus	microcarpa	6.1	6.5
CF	1	Pinaceae	Pinus	kwangtungensis	10.1	4.5
CF	1	Lauraceae	Machilus	microcarpa	5.4	5.5
CF	1	Fagaceae	Cyclobalanopsis	glauca	6	5
CF	1	Juglandaceae	Platycarya	strobilacea	7.9	8
CF	1	Juglandaceae	Platycarya	strobilacea	6.3	8
CF	1	Juglandaceae	Platycarya	strobilacea	10.4	9
CF	1	Betulaceae	Carpinus	lipoensis	5.6	4.5
CF	1	Betulaceae	Carpinus	lipoensis	6.1	4
CF	1	Betulaceae	Carpinus	lipoensis	5.3	4.5
CF	1	Betulaceae	Carpinus	lipoensis	5	4.3
CF	1	Fagaceae	Cyclobalanopsis	glauca	6.4	5
CF	1	Juglandaceae	Platycarya	strobilacea	6	7
CF	1	Juglandaceae	Platycarya	strobilacea	5	6.2
CF	1	Juglandaceae	Platycarya	strobilacea	7.2	9
CF	1	Rutaceae	Clausena	dunniana	7.8	6.5
CF	1	Rutaceae	Clausena	dunniana	6	6
CF	1	Symplocaceae	Symplocos	sumuntia	5.5	5
CF	1	Fagaceae	Cyclobalanopsis	glauca	5.9	8
CF	1	Fagaceae	Cyclobalanopsis	glauca	7.6	8.5
CF	1	Betulaceae	Carpinus	lipoensis	8.6	7
CF	1	Pinaceae	Pinus	kwangtungensis	34.6	12
CF	1	Pinaceae	Pinus	kwangtungensis	34.4	14
CF	1	Pinaceae	Pinus	kwangtungensis	36.1	9.5
CF	1	Betulaceae	Carpinus	lipoensis	6.7	5
CF	1	Fagaceae	Quercus	phillyreoides	6.6	5.5
CF	1	Linaceae	Tirpitzia	sinensis	6.4	6
CF	2	Pinaceae	Pinus	kwangtungensis	27.1	9.5
CF	2	Pinaceae	Pinus	kwangtungensis	15.6	9
CF	2	Betulaceae	Carpinus	lipoensis	5.8	7
CF	2	Pinaceae	Pinus	kwangtungensis	23	8.5
CF	2	Pinaceae	Pinus	kwangtungensis	23	8.5
CF	2	Pinaceae	Pinus	kwangtungensis	7	8
CF	2	Pinaceae	Pinus	kwangtungensis	9	7.5
CF	2	Pinaceae	Pinus	kwangtungensis	18.1	9.5
CF	2	Pinaceae	Pinus	kwangtungensis	38.1	9.5
CF	2	Pinaceae	Pinus	kwangtungensis	10	8.5
CF	2	Pinaceae	Pinus	kwangtungensis	19	9
CF	2	Pinaceae	Pinus	kwangtungensis	7.7	9
CF	2	Hamamelidaceae	Loropetalum	chinense	5.3	6
CF	2	Juglandaceae	Platycarya	strobilacea	5.6	8.5
CF	2	Sapindaceae	Acer	sycopseoides	5.2	6.5
CF	2	Iteaceae	Itea	chinensis	6.4	5.5
CF	2	Pinaceae	Pinus	kwangtungensis	29.5	9.5
CF	2	Juglandaceae	Platycarya	strobilacea	5.5	7
CF	2	Juglandaceae	Platycarya	strobilacea	6.5	7.5
CF	2	Pinaceae	Pinus	kwangtungensis	29.6	12
CF	2	Pinaceae	Pinus	kwangtungensis	6.8	5.5
CF	2	Pinaceae	Pinus	kwangtungensis	38.6	13.5
CF	2	Pinaceae	Pinus	kwangtungensis	27.7	13
CF	2	Pinaceae	Pinus	kwangtungensis	17.8	8.5
CF	2	Pinaceae	Pinus	kwangtungensis	19.6	9.5
CF	2	Betulaceae	Carpinus	lipoensis	5.4	6.5
CF	2	Betulaceae	Carpinus	lipoensis	6	7.5
CF	2	Pinaceae	Pinus	kwangtungensis	31.6	12
CF	2	Pinaceae	Pinus	kwangtungensis	32.4	11
CF	2	Juglandaceae	Platycarya	strobilacea	5.6	7
CF	2	Euphorbiaceae	Triadica	rotundifolia	11.3	8
CF	2	Pinaceae	Pinus	kwangtungensis	33	14
CF	2	Pinaceae	Pinus	kwangtungensis	32	13.5
CF	2	Betulaceae	Carpinus	lipoensis	5.2	8.5
CF	2	Betulaceae	Carpinus	lipoensis	6.6	7.5
CF	2	Juglandaceae	Platycarya	strobilacea	5.4	7.5
CF	2	Fagaceae	Cyclobalanopsis	glauca	5.1	2.5
CF	2	Juglandaceae	Platycarya	strobilacea	6.8	7.5
CF	2	Juglandaceae	Platycarya	strobilacea	7	8
CF	2	Juglandaceae	Platycarya	strobilacea	7.9	9
CF	2	Fagaceae	Quercus	phillyreoides	6.2	6.5
CF	2	Fagaceae	Quercus	phillyreoides	6.2	7
CF	2	Fagaceae	Quercus	phillyreoides	7.3	6.5
CF	2	Fagaceae	Quercus	phillyreoides	5.9	7
CF	2	Fagaceae	Quercus	phillyreoides	6.7	7
CF	2	Juglandaceae	Platycarya	strobilacea	10.2	9
CF	2	Juglandaceae	Platycarya	strobilacea	6.8	8.5
CF	2	Pinaceae	Pinus	kwangtungensis	32.5	12
CF	2	Pinaceae	Pinus	kwangtungensis	30.4	13
CF	2	Pinaceae	Pinus	kwangtungensis	51.7	14
CF	2	Pinaceae	Pinus	kwangtungensis	26	10
CF	2	Sapindaceae	Acer	sycopseoides	5.9	6.5
CF	2	Sapindaceae	Acer	sycopseoides	6	7
CF	2	Betulaceae	Carpinus	lipoensis	15.3	9.5
CF	2	Juglandaceae	Platycarya	strobilacea	6.5	8
CF	2	Pinaceae	Pinus	kwangtungensis	48.4	15
CF	2	Betulaceae	Carpinus	pubescens	12.7	9.5
CF	2	Pinaceae	Pinus	kwangtungensis	30.4	9.5
CF	2	Elaeocarpaceae	Elaeocarpus	sylvestris	8.5	6
CF	2	Sapindaceae	Acer	sycopseoides	6.8	7
CF	2	Pinaceae	Pinus	kwangtungensis	32.5	11.5
CF	2	Pinaceae	Pinus	kwangtungensis	27.9	12
CF	2	Sapindaceae	Acer	sycopseoides	7.9	7.5
CF	2	Sapindaceae	Acer	sycopseoides	7.4	7.5
CF	2	Pinaceae	Pinus	kwangtungensis	49.5	15
CF	2	Sapindaceae	Acer	sycopseoides	6.1	7.5
CF	2	Magnoliaceae	Michelia	martini	7.4	7.5
CF	2	Magnoliaceae	Michelia	martini	9.4	9.5
CF	2	Magnoliaceae	Michelia	martini	5.8	7
CF	2	Pinaceae	Pinus	kwangtungensis	31.5	12.5
CF	2	Pinaceae	Pinus	kwangtungensis	32.3	13.5
CF	2	Pinaceae	Pinus	kwangtungensis	6.9	5
CF	2	Pinaceae	Pinus	kwangtungensis	29.2	12
CF	2	Pinaceae	Pinus	kwangtungensis	40.7	11
CF	2	Juglandaceae	Platycarya	strobilacea	6.8	7.5
CF	2	Hamamelidaceae	Loropetalum	chinense	5.2	4.5
CF	2	Hamamelidaceae	Loropetalum	chinense	6.7	5
CF	2	Hamamelidaceae	Loropetalum	chinense	5.5	4
CF	2	Pinaceae	Pinus	kwangtungensis	31.6	8
CF	2	Pinaceae	Pinus	kwangtungensis	34.5	9
CF	2	Pinaceae	Pinus	kwangtungensis	27.4	9.5
CF	2	Betulaceae	Carpinus	lipoensis	5.4	6.5
CF	3	Fagaceae	Quercus	phillyreoides	6.5	5.5
CF	3	Fagaceae	Quercus	phillyreoides	6.9	5
CF	3	Juglandaceae	Platycarya	strobilacea	6.9	7.5
CF	3	Juglandaceae	Platycarya	strobilacea	6	7
CF	3	Juglandaceae	Platycarya	strobilacea	5.1	4.5
CF	3	Juglandaceae	Platycarya	strobilacea	6.9	7.5
CF	3	Juglandaceae	Platycarya	strobilacea	9.9	9.5
CF	3	Pinaceae	Pinus	kwangtungensis	42.5	13
CF	3	Juglandaceae	Platycarya	strobilacea	12	9.5
CF	3	Juglandaceae	Platycarya	strobilacea	7.3	6.5
CF	3	Juglandaceae	Platycarya	strobilacea	6.6	6
CF	3	Juglandaceae	Platycarya	strobilacea	9.4	9
CF	3	Juglandaceae	Platycarya	strobilacea	5.7	4.5
CF	3	Pinaceae	Pinus	kwangtungensis	46.8	15.5
CF	3	Juglandaceae	Platycarya	strobilacea	9.3	7.5
CF	3	Betulaceae	Carpinus	pubescens	12	7.5
CF	3	Betulaceae	Carpinus	pubescens	6	4.5
CF	3	Betulaceae	Carpinus	pubescens	6.3	6.5
CF	3	Juglandaceae	Platycarya	strobilacea	9.9	8.5
CF	3	Juglandaceae	Platycarya	strobilacea	6.5	6
CF	3	Juglandaceae	Platycarya	strobilacea	6.4	6
CF	3	Juglandaceae	Platycarya	strobilacea	6.4	5
CF	3	Moraceae	Broussonetia	papyrifera	9.3	7
CF	3	Betulaceae	Carpinus	pubescens	5	4.5
CF	3	Juglandaceae	Platycarya	strobilacea	7.1	9
CF	3	Juglandaceae	Platycarya	strobilacea	8.6	7.5
CF	3	Juglandaceae	Platycarya	strobilacea	8.5	8.5
CF	3	Juglandaceae	Platycarya	strobilacea	7.1	7
CF	3	Juglandaceae	Platycarya	strobilacea	6.1	7
CF	3	Staphyleaceae	Euscaphis	japonica	5.6	4.5
CF	3	Juglandaceae	Platycarya	strobilacea	8.8	9.5
CF	3	Juglandaceae	Platycarya	strobilacea	8.5	9
CF	3	Juglandaceae	Platycarya	strobilacea	7.9	8
CF	3	Juglandaceae	Platycarya	strobilacea	5.6	6.5
CF	3	Juglandaceae	Platycarya	strobilacea	6.3	7
CF	3	Sapindaceae	Boniodendron	minius	11	9
CF	3	Fagaceae	Quercus	phillyreoides	5.4	6.5
CF	3	Hamamelidaceae	Loropetalum	chinense	5.6	7.5
CF	3	Hamamelidaceae	Loropetalum	chinense	5.6	6.5
CF	3	Juglandaceae	Platycarya	strobilacea	6.9	8.5
CF	3	Juglandaceae	Platycarya	strobilacea	6.3	9
CF	3	Juglandaceae	Platycarya	strobilacea	7	7.5
CF	3	Juglandaceae	Platycarya	strobilacea	7.8	8.5
CF	3	Juglandaceae	Platycarya	strobilacea	8.4	9.5
CF	3	Juglandaceae	Platycarya	strobilacea	11.7	10.5
CF	3	Pittosporaceae	Pittosporum	glabratum	6.1	7
CF	3	Pinaceae	Pinus	kwangtungensis	42.5	12
CF	3	Anacardiaceae	Toxicodendron	vernicifluum	8.3	8.5
CF	3	Fagaceae	Cyclobalanopsis	glauca	5.4	6.5
CF	3	Fagaceae	Cyclobalanopsis	glauca	6.1	7
CF	3	Fagaceae	Cyclobalanopsis	glauca	6.1	6
CF	3	Juglandaceae	Platycarya	strobilacea	27.7	13
CF	3	Betulaceae	Carpinus	pubescens	6	6.5
CF	3	Pinaceae	Pinus	kwangtungensis	45.5	12
CF	3	Staphyleaceae	Euscaphis	japonica	5.8	6.5
CF	3	Staphyleaceae	Euscaphis	japonica	5	5.5
CF	3	Juglandaceae	Platycarya	strobilacea	8.8	10
CF	3	Juglandaceae	Platycarya	strobilacea	6.2	9.5
CF	3	Sapindaceae	Boniodendron	minius	6.8	8
CF	3	Sapindaceae	Boniodendron	minius	9.8	9.5
CF	3	Juglandaceae	Platycarya	strobilacea	5	10
CF	3	Juglandaceae	Platycarya	strobilacea	6.9	8
CF	3	Pinaceae	Pinus	kwangtungensis	31.9	12
CF	3	Betulaceae	Carpinus	pubescens	9.7	11
CF	3	Betulaceae	Carpinus	pubescens	6.5	7.5
CF	3	Pinaceae	Pinus	kwangtungensis	36.9	12.5
CF	3	Sapindaceae	Boniodendron	minius	6.5	7.5
CF	3	Sapindaceae	Boniodendron	minius	8.3	7.5
CF	3	Juglandaceae	Platycarya	strobilacea	6.5	8
CF	3	Juglandaceae	Platycarya	strobilacea	5	8.5
CF	3	Juglandaceae	Platycarya	strobilacea	6.5	8.5
CF	3	Juglandaceae	Platycarya	strobilacea	5.8	7
CF	3	Juglandaceae	Platycarya	strobilacea	5.6	8
CF	3	Pinaceae	Pinus	kwangtungensis	38.5	14.5
CF	3	Fagaceae	Cyclobalanopsis	glauca	6.5	7.5
CF	3	Fagaceae	Cyclobalanopsis	glauca	6.6	7.5
CF	3	Juglandaceae	Platycarya	strobilacea	8.6	8.5
CF	3	Juglandaceae	Platycarya	strobilacea	12.1	6.5
CF	3	Juglandaceae	Platycarya	strobilacea	11.8	6.5
CF	3	Juglandaceae	Platycarya	strobilacea	7.7	9
CF	3	Juglandaceae	Platycarya	strobilacea	6.4	8.5
CF	3	Lauraceae	Machilus	microcarpa	12	6.5
CF	3	Betulaceae	Carpinus	lipoensis	6.4	6.5
CF	3	Betulaceae	Carpinus	lipoensis	6.8	7
CF	3	Betulaceae	Carpinus	lipoensis	6.8	8
CF	3	Juglandaceae	Platycarya	strobilacea	9.4	8.5
CF	3	Betulaceae	Carpinus	lipoensis	9.2	9.5
CF	3	Betulaceae	Carpinus	lipoensis	5	7
CF	3	Betulaceae	Carpinus	lipoensis	7.4	8.5
CF	3	Fagaceae	Quercus	phillyreoides	5	7.5
CF	3	Juglandaceae	Platycarya	strobilacea	6.8	9.5
CF	3	Juglandaceae	Platycarya	strobilacea	9.6	9.5
CF	3	Fagaceae	Quercus	phillyreoides	6.1	7.5
CF	3	Juglandaceae	Platycarya	strobilacea	8.5	10
CF	3	Juglandaceae	Platycarya	strobilacea	6	8.5
CF	3	Sabiaceae	Meliosma	henryi	5.8	7.5
CF	3	Rubiaceae	Sinoadina	racemosa	6.2	6.5
CF	3	Fagaceae	Quercus	phillyreoides	5.2	6.5
CF	3	Fagaceae	Quercus	phillyreoides	5.1	6.5
CF	3	Fagaceae	Quercus	phillyreoides	7	7
CF	3	Fagaceae	Quercus	phillyreoides	6.3	6.5
CF	3	Fagaceae	Quercus	phillyreoides	6.4	6.5
CF	3	Pinaceae	Pinus	kwangtungensis	69.2	16
CF	3	Fagaceae	Cyclobalanopsis	glauca	9.2	8
CF	3	Juglandaceae	Platycarya	strobilacea	7.3	9
CF	3	Juglandaceae	Platycarya	strobilacea	5.9	8
CF	3	Juglandaceae	Platycarya	strobilacea	10.6	9.5
CF	3	Juglandaceae	Platycarya	strobilacea	5.2	7.5
CF	3	Betulaceae	Carpinus	pubescens	6.5	7.5
CF	3	Pinaceae	Pinus	kwangtungensis	46	13
CF	3	Betulaceae	Carpinus	pubescens	6	8.5
CF	3	Betulaceae	Carpinus	pubescens	7.4	9
CF	3	Betulaceae	Carpinus	pubescens	5.4	7
CF	3	Betulaceae	Carpinus	pubescens	6.9	9.5
CF	3	Betulaceae	Carpinus	pubescens	8.9	11
CF	3	Betulaceae	Carpinus	pubescens	5.5	8.5
CF	3	Juglandaceae	Platycarya	strobilacea	8.1	9.5
CF	3	Betulaceae	Carpinus	pubescens	7.3	7
CF	3	Betulaceae	Carpinus	pubescens	9	9.5
CF	3	Ulmaceae	Ulmus	castaneifolia	9.8	9.5
CF	3	Ulmaceae	Ulmus	castaneifolia	9.5	10.5
CF	3	Ulmaceae	Ulmus	castaneifolia	10.4	11
CF	3	Ulmaceae	Ulmus	castaneifolia	5.8	7.5
CF	3	Juglandaceae	Platycarya	strobilacea	10.4	11
CF	3	Sapindaceae	Acer	sycopseoides	6.7	8.2
CF	3	Juglandaceae	Platycarya	strobilacea	8.6	8.5
CF	3	Elaeocarpaceae	Elaeocarpus	decipiens	5	7.5
CF	3	Cupressaceae	Calocedrus	rupestris	6.6	7.5
CF	3	Ulmaceae	Ulmus	castaneifolia	9.1	9.5
CF	3	Ulmaceae	Ulmus	castaneifolia	10.2	12
CF	3	Hamamelidaceae	Loropetalum	chinense	6.5	7
CF	3	Ulmaceae	Ulmus	castaneifolia	9.5	11
CF	3	Betulaceae	Carpinus	pubescens	6.1	7.5
CF	3	Betulaceae	Carpinus	pubescens	26	13
CF	3	Pinaceae	Pinus	kwangtungensis	52.9	16
CF	3	Betulaceae	Carpinus	pubescens	11.4	9
CF	3	Betulaceae	Carpinus	pubescens	10.5	8.5
CF	3	Ulmaceae	Ulmus	castaneifolia	22.9	12
CF	3	Fagaceae	Castanopsis	fargesii	6.4	8
CF	3	Fagaceae	Castanopsis	fargesii	5.3	4.5
CF	3	Ulmaceae	Ulmus	castaneifolia	11.9	11
CF	3	Sapindaceae	Boniodendron	minius	12.5	9.5
CF	3	Sapindaceae	Boniodendron	minius	7.8	6.5
CF	3	Elaeocarpaceae	Elaeocarpus	sylvestris	7.9	5.5
CF	3	Ulmaceae	Ulmus	castaneifolia	9.5	10
CF	3	Ulmaceae	Ulmus	castaneifolia	11.9	9.5
CF	3	Ulmaceae	Ulmus	castaneifolia	9.1	8.5
CF	3	Hamamelidaceae	Loropetalum	chinense	6.4	5.5
CF	3	Ulmaceae	Ulmus	castaneifolia	7.1	7
CF	3	Ulmaceae	Ulmus	castaneifolia	10.4	12
CF	3	Ulmaceae	Ulmus	castaneifolia	14.7	13
CF	3	Hamamelidaceae	Loropetalum	chinense	5.1	6
CF	3	Hamamelidaceae	Loropetalum	chinense	5.3	6
CF	3	Hamamelidaceae	Loropetalum	chinense	5.5	7.5
CF	3	Juglandaceae	Platycarya	strobilacea	11.2	8.5
CF	3	Juglandaceae	Platycarya	strobilacea	12.2	9.5
CF	3	Juglandaceae	Platycarya	strobilacea	10	10.5
CF	3	Juglandaceae	Platycarya	strobilacea	10.2	9.5
CF	3	Juglandaceae	Platycarya	strobilacea	9.3	10
CF	3	Pinaceae	Pinus	kwangtungensis	32.8	16.5
CF	3	Juglandaceae	Platycarya	strobilacea	9.2	11
CF	3	Juglandaceae	Platycarya	strobilacea	5.8	8.5
CF	3	Salicaceae	Itoa	orientalis	5.6	4
CF	3	Juglandaceae	Platycarya	strobilacea	10.8	9
CF	3	Symplocaceae	Symplocos	sumuntia	5.2	3.5
CF	3	Pinaceae	Pinus	kwangtungensis	42.5	12.5
CF	3	Hamamelidaceae	Loropetalum	chinense	6.7	5.5
CF	3	Pinaceae	Pinus	kwangtungensis	50.8	13
CF	3	Betulaceae	Carpinus	lipoensis	5.3	4.5
CF	3	Pinaceae	Pinus	kwangtungensis	35.9	17
CF	3	Hamamelidaceae	Loropetalum	chinense	5.2	4
CF	3	Salicaceae	Itoa	orientalis	6.8	6.5
CF	3	Juglandaceae	Platycarya	strobilacea	11.6	8
CF	3	Fagaceae	Quercus	phillyreoides	5.9	4
CF	3	Rutaceae	Clausena	dunniana	6.5	4.5
CF	3	Juglandaceae	Platycarya	strobilacea	9.8	7.5
CF	3	Juglandaceae	Platycarya	strobilacea	8.1	5.5
CF	3	Lauraceae	Cinnamomum	camphora	10.7	7.5
CF	3	Juglandaceae	Platycarya	strobilacea	7.9	7.5
CF	3	Betulaceae	Carpinus	pubescens	8	7
CF	3	Juglandaceae	Platycarya	strobilacea	9	8.5
CF	3	Betulaceae	Carpinus	lipoensis	6.1	4.5
CF	3	Betulaceae	Carpinus	lipoensis	5.6	4
CF	3	Pinaceae	Pinus	kwangtungensis	51.7	13
CF	4	Pinaceae	Pinus	kwangtungensis	36.8	9
CF	4	Fagaceae	Castanopsis	fargesii	9.2	8.5
CF	4	Hamamelidaceae	Loropetalum	chinense	5.7	8.5
CF	4	Hamamelidaceae	Loropetalum	chinense	6.7	8.5
CF	4	Lauraceae	Machilus	ichangensis	7.1	7.5
CF	4	Lauraceae	Machilus	ichangensis	5	7.5
CF	4	Lauraceae	Machilus	ichangensis	6.1	7.5
CF	4	Lauraceae	Machilus	ichangensis	5	8
CF	4	Sapindaceae	Acer	sycopseoides	7.1	7
CF	4	Lauraceae	Machilus	ichangensis	5.7	7
CF	4	Hamamelidaceae	Loropetalum	chinense	5.7	8
CF	4	Hamamelidaceae	Loropetalum	chinense	5.6	7.5
CF	4	Juglandaceae	Platycarya	strobilacea	5.9	8.5
CF	4	Aquifoliaceae	Ilex	ficoidea	7.6	7
CF	4	Pinaceae	Pinus	kwangtungensis	45.7	14.5
CF	4	Fagaceae	Quercus	phillyreoides	5.8	7.5
CF	4	Fagaceae	Quercus	phillyreoides	6.6	7.5
CF	4	Fagaceae	Cyclobalanopsis	glauca	6	3
CF	4	Fagaceae	Cyclobalanopsis	glauca	5	7.5
CF	4	Juglandaceae	Platycarya	strobilacea	8.1	8
CF	4	Pinaceae	Pinus	kwangtungensis	31.5	11.5
CF	4	Hamamelidaceae	Loropetalum	chinense	5.4	7
CF	4	Hamamelidaceae	Loropetalum	chinense	5.5	7
CF	4	Juglandaceae	Platycarya	strobilacea	10.8	10
CF	4	Juglandaceae	Platycarya	strobilacea	6.6	7
CF	4	Fagaceae	castanopsis	carlesii	5.5	6
CF	4	Fagaceae	castanopsis	carlesii	5.9	6.5
CF	4	Juglandaceae	Platycarya	strobilacea	6	9.5
CF	4	Fagaceae	castanopsis	carlesii	5.7	9
CF	4	Hamamelidaceae	Loropetalum	chinense	5.5	8.5
CF	4	Hamamelidaceae	Loropetalum	chinense	6.1	8.5
CF	4	Pinaceae	Pinus	kwangtungensis	42.5	13
CF	4	Lauraceae	Machilus	ichangensis	10.8	8.5
CF	4	Fagaceae	Quercus	phillyreoides	7.4	8.5
CF	4	Fagaceae	Quercus	phillyreoides	5.1	7.5
CF	4	Fagaceae	Quercus	phillyreoides	5.1	7.5
CF	4	Juglandaceae	Platycarya	strobilacea	8.4	11
CF	4	Hamamelidaceae	Loropetalum	chinense	5.9	8.5
CF	4	Hamamelidaceae	Loropetalum	chinense	5.7	8.5
CF	4	Hamamelidaceae	Loropetalum	chinense	5.1	8.5
CF	4	Juglandaceae	Platycarya	strobilacea	8.2	7
CF	4	Juglandaceae	Platycarya	strobilacea	9.3	7
CF	4	Juglandaceae	Platycarya	strobilacea	5	6
CF	4	Juglandaceae	Platycarya	strobilacea	7.9	7.5
CF	4	Juglandaceae	Platycarya	strobilacea	6.9	7
CF	4	Betulaceae	Carpinus	lipoensis	5.1	5.7
CF	4	Betulaceae	Carpinus	lipoensis	5.2	7
CF	4	Pinaceae	Pinus	kwangtungensis	31	11
CF	4	Taxaceae	Taxus	wallichiana	6.8	6
CF	4	Simaroubaceae	Picrasma	quassioides	6.9	8
CF	4	Betulaceae	Carpinus	lipoensis	5.4	7.5
CF	4	Betulaceae	Carpinus	lipoensis	5	7.5
CF	4	Sapindaceae	Acer	sycopseoides	7.2	7.5
CF	4	Pinaceae	Pinus	kwangtungensis	39.8	14
CF	4	Juglandaceae	Platycarya	strobilacea	7.7	9.5
CF	4	Juglandaceae	Platycarya	strobilacea	7.9	9
CF	4	Juglandaceae	Platycarya	strobilacea	8.5	9
CF	4	Simaroubaceae	Picrasma	quassioides	5.4	7.5
CF	4	Fagaceae	Cyclobalanopsis	glauca	5.5	6.5
CF	4	Fagaceae	castanopsis	carlesii	6.8	5.5
CF	4	Araliaceae	Dendropanax	dentiger	7.5	6
CF	4	Araliaceae	Dendropanax	dentiger	5.6	6.2
CF	4	Pinaceae	Pinus	kwangtungensis	34	12
CF	4	Fagaceae	Cyclobalanopsis	glauca	5.2	6.5
CF	4	Sapindaceae	Acer	sycopseoides	5.8	6.5
CF	4	Fagaceae	castanopsis	carlesii	5.5	7
CF	4	Pinaceae	Pinus	kwangtungensis	77	15.5
CF	4	Fagaceae	Cyclobalanopsis	glauca	7.6	5
CF	4	Fagaceae	Quercus	phillyreoides	6.2	7
CF	4	Moraceae	Ficus	irisana	9.1	7.5
CF	4	Lauraceae	Cinnamomum	camphora	6.7	6.5
CF	4	Fagaceae	Quercus	phillyreoides	5.5	7
CF	4	Fagaceae	Quercus	phillyreoides	5.8	7
CF	4	Fagaceae	Quercus	phillyreoides	7.6	7
CF	4	Fagaceae	Quercus	phillyreoides	8.6	7
CF	4	Euphorbiaceae	Triadica	rotundifolia	8.9	9
CF	4	Magnoliaceae	Michelia	martini	6.5	8.5
CF	4	Magnoliaceae	Michelia	martini	5.8	7
CF	4	Magnoliaceae	Michelia	martini	8.2	8.5
CF	4	Magnoliaceae	Michelia	martini	9	7
CF	4	Magnoliaceae	Michelia	martini	6.6	7
CF	4	Sapindaceae	Acer	sycopseoides	6.5	7.5
CF	4	Betulaceae	Carpinus	lipoensis	5.2	6
CF	4	Euphorbiaceae	Triadica	rotundifolia	14.8	10
CF	4	Betulaceae	Carpinus	pubescens	6.4	7
CF	4	Pinaceae	Pinus	kwangtungensis	40.4	12
CF	4	Pinaceae	Pinus	kwangtungensis	41.5	13
CF	4	Pinaceae	Pinus	kwangtungensis	38.7	14
CF	4	Pinaceae	Pinus	kwangtungensis	38.2	13.5
CF	4	Betulaceae	Carpinus	lipoensis	8.1	3.5
CF	4	Sapindaceae	Acer	sycopseoides	8.4	4
CF	4	Sapindaceae	Acer	sycopseoides	9.3	4
CF	4	Sapindaceae	Acer	sycopseoides	9.4	3.5
CF	4	Sapindaceae	Acer	sycopseoides	5.5	4
CF	4	Sapindaceae	Acer	sycopseoides	7	4.5
CF	4	Sapindaceae	Acer	sycopseoides	7	4.5
CF	4	Sapindaceae	Acer	sycopseoides	7.1	4.5
CF	4	Sapindaceae	Acer	sycopseoides	5.2	3
CF	4	Sapindaceae	Acer	sycopseoides	5	3
CF	4	Juglandaceae	Platycarya	strobilacea	9.2	8
CF	4	Juglandaceae	Platycarya	strobilacea	6	5
CF	4	Juglandaceae	Platycarya	strobilacea	7.8	6
CF	4	Sapindaceae	Acer	sycopseoides	5.9	5
CF	4	Sapindaceae	Acer	sycopseoides	7.3	4.5
CF	4	Sapindaceae	Acer	sycopseoides	6.7	4.5
CF	4	Fagaceae	Quercus	phillyreoides	5	3.5
CF	4	Fagaceae	Quercus	phillyreoides	7.1	4.5
CF	4	Fagaceae	Quercus	phillyreoides	6.2	5.1
CF	4	Fagaceae	Quercus	phillyreoides	6.7	6
CF	4	Fagaceae	Quercus	phillyreoides	7.2	6.5
CF	4	Linaceae	Tirpitzia	sinensis	7.5	3.5
CF	4	Simaroubaceae	Picrasma	quassioides	5.2	3.5
CF	4	Simaroubaceae	Picrasma	quassioides	5.5	3.5
CF	4	Salicaceae	Itoa	orientalis	9.9	4.5
CF	4	Fagaceae	Quercus	phillyreoides	6.8	3.5
CF	4	Fagaceae	Quercus	phillyreoides	8.5	6.5
CF	4	Fagaceae	Quercus	phillyreoides	6.4	6.5
CF	4	Juglandaceae	Platycarya	strobilacea	11.8	6.7
CF	4	Juglandaceae	Platycarya	strobilacea	6.5	6
CF	4	Fagaceae	Castanopsis	fargesii	10.5	7
CF	4	Fagaceae	Castanopsis	fargesii	7.8	7
CF	4	Fagaceae	Castanopsis	fargesii	14.4	10
CF	4	Fagaceae	Castanopsis	fargesii	8	7
CF	4	Betulaceae	Carpinus	lipoensis	6.1	5
CF	4	Betulaceae	Carpinus	lipoensis	6	2
CF	4	Pinaceae	Pinus	kwangtungensis	41.4	15
CF	4	Simaroubaceae	Picrasma	quassioides	5	6
CF	4	Juglandaceae	Platycarya	strobilacea	9.3	7
CF	4	Juglandaceae	Platycarya	strobilacea	6	5
CF	4	Juglandaceae	Platycarya	strobilacea	8.3	7.5
CF	4	Pinaceae	Pinus	kwangtungensis	33.1	13.6
CF	4	Fagaceae	Quercus	phillyreoides	5.4	5
CF	4	Fagaceae	Quercus	phillyreoides	6.1	3.5
CF	4	Fagaceae	Quercus	phillyreoides	6.2	6.5
CF	4	Pinaceae	Pinus	kwangtungensis	47.8	14.5
CF	4	Pinaceae	Pinus	kwangtungensis	31.8	10.5
CF	4	Juglandaceae	Platycarya	strobilacea	6.6	6
CF	4	Juglandaceae	Platycarya	strobilacea	5.5	5
CF	4	Juglandaceae	Platycarya	strobilacea	9.7	8
CF	4	Juglandaceae	Platycarya	strobilacea	7.8	7
CF	4	Juglandaceae	Platycarya	strobilacea	8.3	7
CF	4	Juglandaceae	Platycarya	strobilacea	5.3	7
CF	4	Juglandaceae	Platycarya	strobilacea	5.4	6
CF	4	Betulaceae	Carpinus	lipoensis	5.1	4.5
CF	4	Sapotaceae	Sinosideroxylon	pedunculatum	6.2	5
CF	4	Fagaceae	Cyclobalanopsis	glauca	5	4.5
CF	4	Pittosporaceae	Pittosporum	glabratum	6.3	4.5
CF	4	Pinaceae	Pinus	kwangtungensis	38.1	12.5
CF	4	Betulaceae	Carpinus	pubescens	7.5	6
CF	4	Betulaceae	Carpinus	pubescens	6.7	6.5
CF	4	Betulaceae	Carpinus	pubescens	6.5	6
CF	4	Betulaceae	Carpinus	pubescens	5.7	5
CF	4	Fagaceae	Quercus	phillyreoides	5.7	6
CF	4	Cupressaceae	Calocedrus	rupestris	5.2	4.5
CF	4	Cupressaceae	Calocedrus	rupestris	5.5	4
CF	4	Fagaceae	Castanopsis	fargesii	6.4	4.5
CF	4	Fagaceae	Castanopsis	fargesii	7.1	5
CF	4	Betulaceae	Carpinus	lipoensis	5.1	4
CF	4	Staphyleaceae	Euscaphis	japonica	5	3.5
CF	4	Fagaceae	Cyclobalanopsis	glauca	5.9	3
CF	4	Fagaceae	Cyclobalanopsis	glauca	5.2	3
CF	4	Juglandaceae	Platycarya	strobilacea	6.8	7
CF	4	Betulaceae	Carpinus	lipoensis	5.3	3.5
CF	4	Pinaceae	Pinus	kwangtungensis	45	15
CF	4	Fagaceae	Quercus	phillyreoides	8.3	5
CF	4	Fagaceae	Quercus	phillyreoides	5.2	4
CF	4	Fagaceae	Quercus	phillyreoides	5.5	4.5
CF	4	Fagaceae	Quercus	phillyreoides	5.1	5
CF	4	Fagaceae	Quercus	phillyreoides	5.8	5
CF	4	Juglandaceae	Platycarya	strobilacea	8.7	6.5
CF	4	Juglandaceae	Platycarya	strobilacea	7.9	6.5
CF	4	Juglandaceae	Platycarya	strobilacea	5.2	4
CF	4	Juglandaceae	Platycarya	strobilacea	5	4
CF	4	Simaroubaceae	Picrasma	quassioides	6.8	4.5
CF	4	Simaroubaceae	Picrasma	quassioides	5.3	4
CF	4	Simaroubaceae	Picrasma	quassioides	5.1	4
CF	4	Juglandaceae	Platycarya	strobilacea	7.8	5.5
CF	4	Juglandaceae	Platycarya	strobilacea	8.3	6.5
CF	4	Juglandaceae	Platycarya	strobilacea	11.3	7
CF	4	Juglandaceae	Platycarya	strobilacea	12.2	7
CF	4	Juglandaceae	Platycarya	strobilacea	7.5	6
CF	4	Pinaceae	Pinus	kwangtungensis	39.7	13.5
CF	5	Juglandaceae	Platycarya	strobilacea	5.6	4.5
CF	5	Pinaceae	Pinus	kwangtungensis	15.2	7
CF	5	Pinaceae	Pinus	kwangtungensis	16.5	7
CF	5	Pinaceae	Pinus	kwangtungensis	22	8
CF	5	Betulaceae	Carpinus	lipoensis	5.1	7.5
CF	5	Juglandaceae	Platycarya	strobilacea	6.2	8
CF	5	Juglandaceae	Platycarya	strobilacea	12.6	8.5
CF	5	Pinaceae	Pinus	kwangtungensis	17.4	7.5
CF	5	Sapindaceae	Boniodendron	minius	8.5	8.5
CF	5	Sapindaceae	Boniodendron	minius	8.8	9.5
CF	5	Pinaceae	Pinus	kwangtungensis	23.1	9
CF	5	Juglandaceae	Platycarya	strobilacea	8.2	7.5
CF	5	Juglandaceae	Platycarya	strobilacea	8.6	7.5
CF	5	Pinaceae	Pinus	kwangtungensis	18.2	9
CF	5	Sapindaceae	Acer	sycopseoides	5.4	7.5
CF	5	Sapindaceae	Acer	sycopseoides	6.2	6
CF	5	Sapindaceae	Boniodendron	minius	7.1	7.5
CF	5	Pinaceae	Pinus	kwangtungensis	15.2	9
CF	5	Fagaceae	Cyclobalanopsis	glauca	9	5
CF	5	Euphorbiaceae	Triadica	rotundifolia	9.3	8.5
CF	5	Staphyleaceae	Euscaphis	japonica	5.6	5
CF	5	Fagaceae	Cyclobalanopsis	glauca	10.5	6
CF	5	Pinaceae	Pinus	kwangtungensis	16.5	10
CF	5	Pinaceae	Pinus	kwangtungensis	6.2	6
CF	5	Rosaceae	Photinia	tushanensis	5.1	6
CF	5	Betulaceae	Carpinus	lipoensis	7.1	6.5
CF	5	Pinaceae	Pinus	kwangtungensis	14.1	8.5
CF	5	Pinaceae	Pinus	kwangtungensis	11.9	8
CF	5	Pinaceae	Pinus	kwangtungensis	14.5	8.5
CF	5	Pinaceae	Pinus	kwangtungensis	6.6	5.5
CF	5	Betulaceae	Carpinus	lipoensis	6.8	7
CF	5	Betulaceae	Carpinus	lipoensis	5.6	7
CF	5	Pinaceae	Pinus	kwangtungensis	13	8.5
CF	5	Fagaceae	Quercus	phillyreoides	8.3	7
CF	5	Fagaceae	castanopsis	carlesii	8.2	9.5
CF	5	Pinaceae	Pinus	kwangtungensis	20.6	9.5
CF	5	Pinaceae	Pinus	kwangtungensis	21.5	9.5
CF	5	Juglandaceae	Platycarya	strobilacea	7.4	7.5
CF	5	Pinaceae	Pinus	kwangtungensis	15.5	8
CF	5	Betulaceae	Carpinus	lipoensis	5.1	4.5
CF	5	Betulaceae	Carpinus	lipoensis	5.2	6
CF	5	Betulaceae	Carpinus	lipoensis	5.1	6
CF	5	Pinaceae	Pinus	kwangtungensis	11.4	8
CF	5	Juglandaceae	Platycarya	strobilacea	6.4	8
CF	5	Juglandaceae	Platycarya	strobilacea	5.6	8
CF	5	Pinaceae	Pinus	kwangtungensis	14.6	8.5
CF	5	Pinaceae	Pinus	kwangtungensis	7.5	7
CF	5	Pinaceae	Pinus	kwangtungensis	12.1	8.5
CF	5	Sapindaceae	Boniodendron	minius	5.1	8
CF	5	Juglandaceae	Platycarya	strobilacea	7.6	4.5
CF	5	Pinaceae	Pinus	kwangtungensis	28.2	11
CF	5	Moraceae	Ficus	irisana	6	5
CF	5	Pinaceae	Pinus	kwangtungensis	15.2	9
CF	5	Betulaceae	Carpinus	lipoensis	5.3	4
CF	5	Betulaceae	Carpinus	lipoensis	5.1	5
CF	5	Pinaceae	Pinus	kwangtungensis	12.1	8.5
CF	5	Pinaceae	Pinus	kwangtungensis	7.5	7.5
CF	5	Pittosporaceae	Pittosporum	glabratum	6.7	7
CF	5	Fagaceae	Cyclobalanopsis	glauca	5.7	8
CF	5	Betulaceae	Carpinus	lipoensis	7.5	7
CF	5	Fagaceae	Cyclobalanopsis	glauca	5.2	7
CF	5	Pinaceae	Pinus	kwangtungensis	27.2	9.5
CF	5	Pinaceae	Pinus	kwangtungensis	34.2	10.5
CF	5	Pinaceae	Pinus	kwangtungensis	16	10
CF	5	Pinaceae	Pinus	kwangtungensis	28.1	9
CF	5	Staphyleaceae	Euscaphis	japonica	8.7	6.5
CF	5	Staphyleaceae	Euscaphis	japonica	11	6
CF	5	Pinaceae	Pinus	kwangtungensis	15	8
CF	5	Pinaceae	Pinus	kwangtungensis	7.8	7
CF	5	Fagaceae	Cyclobalanopsis	glauca	10.8	8.5
CF	5	Pinaceae	Pinus	kwangtungensis	7.1	7
CF	5	Pinaceae	Pinus	kwangtungensis	28.5	11
CF	5	Juglandaceae	Platycarya	strobilacea	8.5	9
CF	5	Linaceae	Tirpitzia	sinensis	6	5.5
CF	5	Pinaceae	Pinus	kwangtungensis	21.5	9.5
CF	5	Juglandaceae	Platycarya	strobilacea	10.1	7.5
CF	5	Juglandaceae	Platycarya	strobilacea	7.4	7.5
CF	5	Juglandaceae	Platycarya	strobilacea	11.7	7.5
CF	5	Juglandaceae	Platycarya	strobilacea	8.1	7.5
CF	5	Juglandaceae	Platycarya	strobilacea	8.5	7
CF	5	Juglandaceae	Platycarya	strobilacea	5.5	5
CF	5	Juglandaceae	Platycarya	strobilacea	5.4	5.5
CF	5	Juglandaceae	Platycarya	strobilacea	6.8	7
CF	5	Juglandaceae	Platycarya	strobilacea	5.2	5
CF	5	Juglandaceae	Platycarya	strobilacea	8.9	6.5
CF	5	Pinaceae	Pinus	kwangtungensis	11	8.5
CF	5	Pinaceae	Pinus	kwangtungensis	5.5	5
CF	5	Pinaceae	Pinus	kwangtungensis	19.8	11
CF	5	Pinaceae	Pinus	kwangtungensis	11.5	8
CF	5	Rosaceae	Photinia	tushanensis	7.2	6
CF	5	Rosaceae	Photinia	tushanensis	7.6	6
CF	5	Rosaceae	Photinia	tushanensis	7.2	6.2
CF	5	Pinaceae	Pinus	kwangtungensis	22.2	10
CF	5	Fagaceae	Quercus	phillyreoides	5.5	8
CF	5	Fagaceae	Quercus	phillyreoides	5.7	7.5
CF	5	Juglandaceae	Platycarya	strobilacea	6	6.5
CF	5	Juglandaceae	Platycarya	strobilacea	10.6	8.5
CF	5	Juglandaceae	Platycarya	strobilacea	5	8
CF	5	Juglandaceae	Platycarya	strobilacea	8.3	8
CF	5	Pinaceae	Pinus	kwangtungensis	30	11
CF	5	Pinaceae	Pinus	kwangtungensis	12.4	8
CF	5	Juglandaceae	Platycarya	strobilacea	9.3	7
CF	5	Pinaceae	Pinus	kwangtungensis	9.6	5
CF	5	Pinaceae	Pinus	kwangtungensis	12	9
CF	5	Pinaceae	Pinus	kwangtungensis	27.7	10.5
CF	5	Pinaceae	Pinus	kwangtungensis	8.5	9
CF	5	Sapotaceae	Sinosideroxylon	pedunculatum	5.8	6
CF	5	Sapotaceae	Sinosideroxylon	pedunculatum	5.8	6
CF	5	Pinaceae	Pinus	kwangtungensis	6.5	5
CF	5	Pinaceae	Pinus	kwangtungensis	17.2	9
CF	5	Sapotaceae	Sinosideroxylon	pedunculatum	6.5	6
CF	5	Fagaceae	Quercus	jenseniana	6.8	6
CF	5	Pinaceae	Pinus	kwangtungensis	12.2	9
CF	5	Pinaceae	Pinus	kwangtungensis	12.4	8.5
CF	5	Pinaceae	Pinus	kwangtungensis	27.2	10.8
CF	5	Pinaceae	Pinus	kwangtungensis	6.3	6
CF	5	Pinaceae	Pinus	kwangtungensis	6.7	6.5
CF	5	Pinaceae	Pinus	kwangtungensis	33.9	13.5
CF	5	Juglandaceae	Platycarya	strobilacea	6.5	9
CF	5	Pinaceae	Pinus	kwangtungensis	7.8	8
CF	5	Pinaceae	Pinus	kwangtungensis	13.4	10
CF	5	Pinaceae	Pinus	kwangtungensis	12.4	9
CF	5	Pinaceae	Pinus	kwangtungensis	7.2	7.6
CF	5	Sapotaceae	Sinosideroxylon	pedunculatum	5.9	4
CF	5	Juglandaceae	Platycarya	strobilacea	6.5	8
CF	5	Juglandaceae	Platycarya	strobilacea	6.5	7
CF	5	Pinaceae	Pinus	kwangtungensis	16.8	7.5
CF	5	Pinaceae	Pinus	kwangtungensis	15	5.5
CF	5	Pinaceae	Pinus	kwangtungensis	8.9	5
CF	5	Pinaceae	Pinus	kwangtungensis	11.3	6
CF	5	Pinaceae	Pinus	kwangtungensis	11.7	5.5
CF	5	Pinaceae	Pinus	kwangtungensis	9.9	5
CF	5	Juglandaceae	Platycarya	strobilacea	5.5	5
CF	5	Juglandaceae	Platycarya	strobilacea	5.9	5
CF	5	Juglandaceae	Platycarya	strobilacea	6.7	5.5
CF	5	Juglandaceae	Platycarya	strobilacea	8.1	6.5
CF	5	Juglandaceae	Platycarya	strobilacea	6.7	6
CF	5	Juglandaceae	Platycarya	strobilacea	8.9	6.7
CF	5	Juglandaceae	Platycarya	strobilacea	8.7	6.5
CF	5	Fagaceae	Quercus	phillyreoides	5.7	4.5
CF	5	Fagaceae	Quercus	phillyreoides	6.2	4.5
CF	5	Pinaceae	Pinus	kwangtungensis	6.8	6.5
CF	5	Pinaceae	Pinus	kwangtungensis	24.3	9
CF	5	Juglandaceae	Platycarya	strobilacea	5.8	8
CF	5	Fagaceae	Quercus	phillyreoides	5	6
CF	5	Pinaceae	Pinus	kwangtungensis	10.5	8.5
CF	5	Pinaceae	Pinus	kwangtungensis	11.5	8
CF	5	Pinaceae	Pinus	kwangtungensis	10.8	7
CF	5	Fagaceae	Quercus	phillyreoides	6.3	5.5
CF	5	Sapindaceae	Acer	sycopseoides	5.7	7.5
CF	5	Pinaceae	Pinus	kwangtungensis	6	7
CF	5	Pinaceae	Pinus	kwangtungensis	12.7	9
CF	5	Pinaceae	Pinus	kwangtungensis	9.8	9
CF	5	Sapindaceae	Acer	sycopseoides	5.1	7.5
CF	5	Sapindaceae	Acer	sycopseoides	5.5	7
CF	5	Pinaceae	Pinus	kwangtungensis	13.2	10
CF	5	Pinaceae	Pinus	kwangtungensis	21.2	10
CF	5	Pinaceae	Pinus	kwangtungensis	12.8	8
CF	5	Pinaceae	Pinus	kwangtungensis	11.5	9
CF	5	Pinaceae	Pinus	kwangtungensis	9.7	9
CF	5	Pinaceae	Pinus	kwangtungensis	10.3	10.5
CF	6	Fagaceae	Cyclobalanopsis	myrsinifolia	6.5	4.2
CF	6	Pinaceae	Pinus	kwangtungensis	31.7	9.5
CF	6	Betulaceae	Carpinus	lipoensis	3.5	3.5
CF	6	Fagaceae	Lithocarpus	glaber	6.3	5.2
CF	6	Fagaceae	Lithocarpus	glaber	5.4	5
CF	6	Fagaceae	Lithocarpus	glaber	5.7	4.8
CF	6	Pinaceae	Pinus	kwangtungensis	15.5	8.5
CF	6	Pinaceae	Pinus	kwangtungensis	9	7.8
CF	6	Pinaceae	Pinus	kwangtungensis	7.2	6.5
CF	6	Pinaceae	Pinus	kwangtungensis	14	5.8
CF	6	Betulaceae	Carpinus	lipoensis	6.5	4.5
CF	6	Pinaceae	Pinus	kwangtungensis	24.2	7.5
CF	6	Pinaceae	Pinus	kwangtungensis	17.5	5.8
CF	6	Pinaceae	Pinus	kwangtungensis	6.5	3.5
CF	6	Juglandaceae	Platycarya	strobilacea	5.8	5.5
CF	6	Pinaceae	Pinus	kwangtungensis	28.5	10.5
CF	6	Juglandaceae	Platycarya	strobilacea	5.8	3.5
CF	6	Pinaceae	Pinus	kwangtungensis	20	7.5
CF	6	Pinaceae	Pinus	kwangtungensis	11	5.5
CF	6	Pinaceae	Pinus	kwangtungensis	21	8.5
CF	6	Juglandaceae	Platycarya	strobilacea	5.5	4.5
CF	6	Pinaceae	Pinus	kwangtungensis	12	7.5
CF	6	Pinaceae	Pinus	kwangtungensis	7.5	6.5
CF	6	Pinaceae	Pinus	kwangtungensis	8.6	5.5
CF	6	Pinaceae	Pinus	kwangtungensis	8.6	7
CF	6	Pinaceae	Pinus	kwangtungensis	8.9	6
CF	6	Pinaceae	Pinus	kwangtungensis	9.4	7
CF	6	Pinaceae	Pinus	kwangtungensis	14.8	8.5
CF	6	Pinaceae	Pinus	kwangtungensis	7.7	6.5
CF	6	Pinaceae	Pinus	kwangtungensis	7.9	6.5
CF	6	Pinaceae	Pinus	kwangtungensis	10.8	7.5
CF	6	Pinaceae	Pinus	kwangtungensis	26.5	6.5
CF	6	Pinaceae	Pinus	kwangtungensis	12.7	6.5
CF	6	Juglandaceae	Platycarya	strobilacea	6.5	4.5
CF	6	Pinaceae	Pinus	kwangtungensis	7.2	6
CF	6	Fagaceae	Quercus	fooningensis	5.2	3.5
CF	6	Fagaceae	Quercus	fooningensis	5.3	3.5
CF	6	Fagaceae	Quercus	fooningensis	5.3	3.5
CF	6	Fagaceae	Quercus	fooningensis	6.8	3
CF	6	Fagaceae	Quercus	fooningensis	6.3	3
CF	6	Moraceae	Ficus	microcarpa	7.9	3.5
CF	6	Pinaceae	Pinus	kwangtungensis	23.2	7
CF	6	Pinaceae	Pinus	kwangtungensis	26.6	8
CF	6	Pinaceae	Pinus	kwangtungensis	15.2	3.5
CF	6	Pinaceae	Pinus	kwangtungensis	10.5	3.5
CF	6	Pinaceae	Pinus	kwangtungensis	8.1	3
CF	6	Pinaceae	Pinus	kwangtungensis	9.5	7
CF	6	Pinaceae	Pinus	kwangtungensis	9.1	6
CF	6	Pinaceae	Pinus	kwangtungensis	16.6	7
CF	6	Pinaceae	Pinus	kwangtungensis	9.2	3
CF	6	Pinaceae	Pinus	kwangtungensis	8.7	6.5
CF	6	Fagaceae	Quercus	fooningensis	6.2	3.5
CF	6	Fagaceae	Quercus	fooningensis	5.4	3
CF	6	Magnoliaceae	Michelia	martini	5.6	2.5
CF	6	Magnoliaceae	Michelia	martini	5.2	2.5
CF	6	Pinaceae	Pinus	kwangtungensis	5.6	4
CF	6	Fagaceae	Quercus	fooningensis	5.6	4
CF	6	Fagaceae	Quercus	fooningensis	5.5	3.5
CF	6	Fagaceae	Cyclobalanopsis	glauca	8.2	5
CF	6	Pinaceae	Pinus	kwangtungensis	9.9	5
CF	6	Pinaceae	Pinus	kwangtungensis	17.4	8.5
CF	6	Pinaceae	Pinus	kwangtungensis	35.2	9.5
CF	6	Pinaceae	Pinus	kwangtungensis	5.4	3
CF	6	Pinaceae	Pinus	kwangtungensis	8	6
CF	6	Pinaceae	Pinus	kwangtungensis	10	6.8
CF	6	Fagaceae	Cyclobalanopsis	glauca	7.5	6.5
CF	6	Rosaceae	Photinia	tushanensis	7.2	7
CF	6	Pinaceae	Pinus	kwangtungensis	39.8	12
CF	6	Pinaceae	Pinus	kwangtungensis	13	7
CF	6	Fagaceae	Cyclobalanopsis	myrsinifolia	14.5	6.5
CF	6	Pinaceae	Pinus	kwangtungensis	31.5	8.5
CF	6	Betulaceae	Carpinus	lipoensis	5	7.5
CF	6	Betulaceae	Carpinus	lipoensis	5.5	4.5
CF	6	Betulaceae	Carpinus	lipoensis	7.5	7.5
CF	6	Fagaceae	Cyclobalanopsis	glauca	6.5	5.5
CF	6	Betulaceae	Carpinus	lipoensis	6.4	6.5
CF	6	Betulaceae	Carpinus	lipoensis	5.5	5
CF	6	Betulaceae	Carpinus	lipoensis	5.8	5
CF	6	Pinaceae	Pinus	kwangtungensis	23.2	9.5
CF	6	Pinaceae	Pinus	kwangtungensis	22.2	7.5
CF	6	Sapotaceae	Sinosideroxylon	pedunculatum	7.2	6
CF	7	Pinaceae	Pinus	kwangtungensis	12.6	8
CF	7	Pinaceae	Pinus	kwangtungensis	15.5	8.5
CF	7	Pinaceae	Pinus	kwangtungensis	20.8	11
CF	7	Pinaceae	Pinus	kwangtungensis	31.5	11.5
CF	7	Pinaceae	Pinus	kwangtungensis	15	8.5
CF	7	Juglandaceae	Platycarya	strobilacea	5	7.5
CF	7	Fagaceae	Cyclobalanopsis	glauca	7.8	6
CF	7	Fagaceae	Cyclobalanopsis	glauca	7.6	7.5
CF	7	Pinaceae	Pinus	kwangtungensis	21.2	9.5
CF	7	Pinaceae	Pinus	kwangtungensis	6.2	5
CF	7	Pinaceae	Pinus	kwangtungensis	6.4	7.5
CF	7	Juglandaceae	Platycarya	strobilacea	5.1	7.5
CF	7	Pinaceae	Pinus	kwangtungensis	18.8	8.5
CF	7	Pinaceae	Pinus	kwangtungensis	14.3	9
CF	7	Pinaceae	Pinus	kwangtungensis	21.7	7.5
CF	7	Fagaceae	Cyclobalanopsis	glauca	5.8	8
CF	7	Fagaceae	Cyclobalanopsis	glauca	6.3	7.5
CF	7	Pinaceae	Pinus	kwangtungensis	21	9
CF	7	Pinaceae	Pinus	kwangtungensis	7.3	4.5
CF	7	Pinaceae	Pinus	kwangtungensis	9.8	6.5
CF	7	Pinaceae	Pinus	kwangtungensis	11	6.5
CF	7	Pinaceae	Pinus	kwangtungensis	9.8	6
CF	7	Pinaceae	Pinus	kwangtungensis	15.8	5.8
CF	7	Pinaceae	Pinus	kwangtungensis	17	7.5
CF	7	Pinaceae	Pinus	kwangtungensis	16.2	8
CF	7	Pinaceae	Pinus	kwangtungensis	5.7	3.5
CF	7	Pinaceae	Pinus	kwangtungensis	15	8.5
CF	7	Fagaceae	Lithocarpus	glaber	5.8	3.5
CF	7	Pinaceae	Pinus	kwangtungensis	6	5
CF	7	Pinaceae	Pinus	kwangtungensis	8.8	7
CF	7	Pinaceae	Pinus	kwangtungensis	8.7	8.5
CF	7	Pinaceae	Pinus	kwangtungensis	9.8	7.2
CF	7	Pinaceae	Pinus	kwangtungensis	11.1	8.5
CF	7	Pinaceae	Pinus	kwangtungensis	9	7.5
CF	7	Pinaceae	Pinus	kwangtungensis	9.9	9.5
CF	7	Pinaceae	Pinus	kwangtungensis	12.2	9.2
CF	7	Fagaceae	Cyclobalanopsis	glauca	7.8	7.5
CF	7	Juglandaceae	Platycarya	strobilacea	6.5	8.5
CF	7	Fagaceae	Cyclobalanopsis	myrsinifolia	6.6	7.2
CF	7	Fagaceae	Cyclobalanopsis	myrsinifolia	6.9	8
CF	7	Betulaceae	Carpinus	lipoensis	5.1	8
CF	7	Pinaceae	Pinus	kwangtungensis	19.4	11
CF	7	Pittosporaceae	Pittosporum	glabratum	5.8	3.5
CF	7	Pinaceae	Pinus	kwangtungensis	7	3.5
CF	7	Pinaceae	Pinus	kwangtungensis	16	7.5
CF	7	Pinaceae	Pinus	kwangtungensis	6.9	6.2
CF	7	Pinaceae	Pinus	kwangtungensis	9.8	7.5
CF	7	Pinaceae	Pinus	kwangtungensis	15.1	4
CF	7	Pinaceae	Pinus	kwangtungensis	18.3	6.5
CF	7	Pinaceae	Pinus	kwangtungensis	7.5	6
CF	7	Pinaceae	Pinus	kwangtungensis	16.2	6
CF	7	Pinaceae	Pinus	kwangtungensis	9.8	5
CF	7	Pinaceae	Pinus	kwangtungensis	10.7	4
CF	7	Pinaceae	Pinus	kwangtungensis	7.2	2.5
CF	7	Fagaceae	Quercus	phillyraeoides	5.2	4.5
CF	7	Pinaceae	Pinus	kwangtungensis	9.2	8
CF	7	Pinaceae	Pinus	kwangtungensis	24.5	9
CF	7	Pinaceae	Pinus	kwangtungensis	15	6
CF	7	Pinaceae	Pinus	kwangtungensis	5.5	5
CF	7	Pinaceae	Pinus	kwangtungensis	28	11
CF	7	Fagaceae	Quercus	phillyraeoides	6.1	5
CF	7	Pinaceae	Pinus	kwangtungensis	5.4	4
CF	7	Pinaceae	Pinus	kwangtungensis	9.7	5
CF	7	Pinaceae	Pinus	kwangtungensis	8	5
CF	7	Pinaceae	Pinus	kwangtungensis	8.1	5
CF	7	Rosaceae	Photinia	tushanensis	5.5	5
CF	7	Rosaceae	Photinia	tushanensis	5.5	4
CF	7	Fagaceae	Quercus	phillyraeoides	6	5.5
CF	7	Fagaceae	Quercus	phillyraeoides	5.9	4
CF	7	Fagaceae	Quercus	phillyraeoides	9.3	5
CF	7	Fagaceae	Quercus	phillyraeoides	7.8	6
CF	7	Pinaceae	Pinus	kwangtungensis	21.6	7
CF	7	Pinaceae	Pinus	kwangtungensis	19.2	6
CF	7	Rosaceae	Photinia	tushanensis	5.3	5
CF	7	Juglandaceae	Platycarya	strobilacea	5.4	6
CF	7	Juglandaceae	Platycarya	strobilacea	5	4
CF	7	Fagaceae	Quercus	phillyraeoides	6.8	6
CF	7	Fagaceae	Quercus	phillyraeoides	5.1	4
CF	7	Fagaceae	Quercus	phillyraeoides	6.9	4
CF	7	Fagaceae	Quercus	phillyraeoides	6.3	6
CF	7	Fagaceae	Quercus	phillyraeoides	8.3	6
CF	7	Pinaceae	Pinus	kwangtungensis	39.3	8
CF	7	Pinaceae	Pinus	kwangtungensis	12.3	6
CF	7	Pinaceae	Pinus	kwangtungensis	8.1	3
CF	8	Fagaceae	Lithocarpus	glaber	8	7
CF	8	Fagaceae	Lithocarpus	glaber	8.3	6.5
CF	8	Pinaceae	Pinus	kwangtungensis	40.3	9.5
CF	8	Pinaceae	Pinus	kwangtungensis	7.8	6.5
CF	8	Pinaceae	Pinus	kwangtungensis	15.3	8
CF	8	Pinaceae	Pinus	kwangtungensis	14.8	8.5
CF	8	Pinaceae	Pinus	kwangtungensis	6.3	9.5
CF	8	Pinaceae	Pinus	kwangtungensis	25.3	11.5
CF	8	Pinaceae	Pinus	kwangtungensis	10	8.5
CF	8	Fagaceae	Cyclobalanopsis	myrsinifolia	6	6.5
CF	8	Juglandaceae	Platycarya	strobilacea	5	7.5
CF	8	Juglandaceae	Platycarya	strobilacea	5.7	8
CF	8	Fagaceae	Quercus	phillyraeoides	6.6	6
CF	8	Fagaceae	Cyclobalanopsis	myrsinifolia	5.6	4.5
CF	8	Fagaceae	Cyclobalanopsis	myrsinifolia	5.2	7.5
CF	8	Fagaceae	Cyclobalanopsis	myrsinifolia	6	7.5
CF	8	Fagaceae	Cyclobalanopsis	myrsinifolia	5.2	5.8
CF	8	Pinaceae	Pinus	kwangtungensis	10.8	9.5
CF	8	Pinaceae	Pinus	kwangtungensis	8.6	8.5
CF	8	Pinaceae	Pinus	kwangtungensis	8.1	7.5
CF	8	Pinaceae	Pinus	kwangtungensis	10.7	8.8
CF	8	Pinaceae	Pinus	kwangtungensis	34.6	13
CF	8	Pinaceae	Pinus	kwangtungensis	5.2	5
CF	8	Pinaceae	Pinus	kwangtungensis	20.5	9
CF	8	Pinaceae	Pinus	kwangtungensis	14.6	8.2
CF	8	Pinaceae	Pinus	kwangtungensis	6.6	7.5
CF	8	Pinaceae	Pinus	kwangtungensis	9.4	8.2
CF	8	Pinaceae	Pinus	kwangtungensis	11.1	9
CF	8	Pinaceae	Pinus	kwangtungensis	10	7.8
CF	8	Pinaceae	Pinus	kwangtungensis	7.3	6.5
CF	8	Fagaceae	Cyclobalanopsis	myrsinifolia	6.8	7.8
CF	8	Pinaceae	Pinus	kwangtungensis	12.6	9.8
CF	8	Pinaceae	Pinus	kwangtungensis	9.5	7.5
CF	8	Sapindaceae	Acer	sycopseoides	5.5	6.5
CF	8	Sapindaceae	Boniodendron	minus	6.8	9.5
CF	8	Sapindaceae	Boniodendron	minus	6.4	7.5
CF	8	Pinaceae	Pinus	kwangtungensis	5.8	6
CF	8	Pinaceae	Pinus	kwangtungensis	5.5	5.5
CF	8	Juglandaceae	Platycarya	strobilacea	5.8	8
CF	8	Juglandaceae	Platycarya	strobilacea	5.2	6.5
CF	8	Pinaceae	Pinus	kwangtungensis	23.2	9.8
CF	8	Fagaceae	Cyclobalanopsis	myrsinifolia	6.6	5.5
CF	8	Fagaceae	Cyclobalanopsis	myrsinifolia	5.3	6.5
CF	8	Fagaceae	Cyclobalanopsis	myrsinifolia	5.2	6.5
CF	8	Pinaceae	Pinus	kwangtungensis	11.7	7.5
CF	8	Fagaceae	Cyclobalanopsis	myrsinifolia	7.9	6.5
CF	8	Fagaceae	Cyclobalanopsis	myrsinifolia	8	7.5
CF	8	Pinaceae	Pinus	kwangtungensis	6.4	4.5
CF	8	Pinaceae	Pinus	kwangtungensis	8.3	3.5
CF	8	Juglandaceae	Platycarya	strobilacea	5.6	6
CF	8	Juglandaceae	Platycarya	strobilacea	6.1	6
CF	8	Juglandaceae	Platycarya	strobilacea	6.9	5.5
CF	8	Pinaceae	Pinus	kwangtungensis	24.3	7.5
CF	8	Fagaceae	Quercus	phillyraeoides	6.2	4
CF	8	Pinaceae	Pinus	kwangtungensis	13.7	4
CF	8	Pinaceae	Pinus	kwangtungensis	6	4
CF	8	Pinaceae	Pinus	kwangtungensis	5.1	3.5
CF	8	Pinaceae	Pinus	kwangtungensis	6.4	3.5
CF	8	Pinaceae	Pinus	kwangtungensis	6.2	3.5
CF	8	Pinaceae	Pinus	kwangtungensis	12.5	4
CF	8	Juglandaceae	Platycarya	strobilacea	5.3	7
CF	8	Juglandaceae	Platycarya	strobilacea	5.4	6
CF	8	Pinaceae	Pinus	kwangtungensis	5.6	3.5
CF	8	Juglandaceae	Platycarya	strobilacea	5.9	8
CF	8	Juglandaceae	Platycarya	strobilacea	5.5	7.5
CF	8	Pinaceae	Pinus	kwangtungensis	5.7	4
CF	8	Pinaceae	Pinus	kwangtungensis	10.1	4.5
CF	8	Pinaceae	Pinus	kwangtungensis	5.3	4.5
CF	8	Pinaceae	Pinus	kwangtungensis	5.8	6
CF	8	Pinaceae	Pinus	kwangtungensis	8.7	7.5
CF	8	Pinaceae	Pinus	kwangtungensis	10.8	4
CF	8	Juglandaceae	Platycarya	strobilacea	5.5	6
CF	8	Pinaceae	Pinus	kwangtungensis	6.2	3.5
CF	8	Pinaceae	Pinus	kwangtungensis	14.8	5.5
CF	8	Pinaceae	Pinus	kwangtungensis	16.5	5
CF	8	Pinaceae	Pinus	kwangtungensis	8.2	7
CF	8	Fagaceae	Quercus	phillyraeoides	5.1	5
CF	8	Fagaceae	Quercus	phillyraeoides	5.4	4
CF	8	Pinaceae	Pinus	kwangtungensis	11.2	5.5
CF	8	Pinaceae	Pinus	kwangtungensis	10.7	7
CF	8	Pinaceae	Pinus	kwangtungensis	6.9	6.5
CF	8	Pinaceae	Pinus	kwangtungensis	7.8	4
CF	8	Pinaceae	Pinus	kwangtungensis	11.2	8
CF	8	Juglandaceae	Platycarya	strobilacea	5.5	6
CF	8	Juglandaceae	Platycarya	strobilacea	6.1	6.5
CF	8	Fagaceae	Quercus	phillyraeoides	5.5	6
CF	8	Fagaceae	Quercus	phillyraeoides	5.1	6
CF	8	Fagaceae	Quercus	phillyraeoides	5.5	6
CF	8	Fagaceae	Quercus	phillyraeoides	5.7	5.5
CF	8	Juglandaceae	Platycarya	strobilacea	6.1	6
CF	8	Juglandaceae	Platycarya	strobilacea	6.1	5
CF	8	Juglandaceae	Platycarya	strobilacea	5.7	4
CF	8	Fagaceae	Quercus	phillyraeoides	5.9	6
CF	8	Fagaceae	Quercus	phillyraeoides	5.4	4.5
CF	8	Fagaceae	Quercus	phillyraeoides	5.3	4
CF	8	Pinaceae	Pinus	kwangtungensis	7.9	7
CF	8	Pinaceae	Pinus	kwangtungensis	7.5	4
CF	8	Pinaceae	Pinus	kwangtungensis	7.8	5
CF	8	Pinaceae	Pinus	kwangtungensis	6.8	4
CF	8	Pinaceae	Pinus	kwangtungensis	8.1	3
CF	8	Pinaceae	Pinus	kwangtungensis	35.1	9
CF	8	Pinaceae	Pinus	kwangtungensis	7.2	4
CF	8	Pinaceae	Pinus	kwangtungensis	8.6	4
CF	9	Pinaceae	Pinus	kwangtungensis	9.2	6.5
CF	9	Pinaceae	Pinus	kwangtungensis	9.8	7.8
CF	9	Pinaceae	Pinus	kwangtungensis	15.5	7.6
CF	9	Pinaceae	Pinus	kwangtungensis	5.8	4.5
CF	9	Juglandaceae	Platycarya	strobilacea	6	7.5
CF	9	Juglandaceae	Platycarya	strobilacea	5.7	7.8
CF	9	Juglandaceae	Platycarya	strobilacea	5.8	7.8
CF	9	Pinaceae	Pinus	kwangtungensis	6.3	6.5
CF	9	Juglandaceae	Platycarya	strobilacea	5	6.5
CF	9	Pinaceae	Pinus	kwangtungensis	12	9
CF	9	Pinaceae	Pinus	kwangtungensis	11.5	9.5
CF	9	Fagaceae	Cyclobalanopsis	myrsinifolia	7.1	9.5
CF	9	Fagaceae	Cyclobalanopsis	myrsinifolia	7.3	9
CF	9	Fagaceae	Cyclobalanopsis	myrsinifolia	6.1	8
CF	9	Juglandaceae	Platycarya	strobilacea	5.6	8.5
CF	9	Pinaceae	Pinus	kwangtungensis	6	7.5
CF	9	Juglandaceae	Platycarya	strobilacea	6.8	7
CF	9	Juglandaceae	Platycarya	strobilacea	6.5	7.8
CF	9	Juglandaceae	Platycarya	strobilacea	5.5	6.5
CF	9	Juglandaceae	Platycarya	strobilacea	5.9	7
CF	9	Pinaceae	Pinus	kwangtungensis	7	6.5
CF	9	Pinaceae	Pinus	kwangtungensis	5.8	5.2
CF	9	Pinaceae	Pinus	kwangtungensis	7.7	6.8
CF	9	Pinaceae	Pinus	kwangtungensis	9.9	6.8
CF	9	Fagaceae	Cyclobalanopsis	myrsinifolia	7.6	4.5
CF	9	Fagaceae	Cyclobalanopsis	myrsinifolia	6	4.8
CF	9	Fagaceae	Cyclobalanopsis	myrsinifolia	6.8	4.5
CF	9	Pinaceae	Pinus	kwangtungensis	5.1	4.5
CF	9	Pinaceae	Pinus	kwangtungensis	9.1	5.8
CF	9	Pinaceae	Pinus	kwangtungensis	7.3	5.4
CF	9	Pinaceae	Pinus	kwangtungensis	14	7
CF	9	Pinaceae	Pinus	kwangtungensis	11	6.8
CF	9	Pinaceae	Pinus	kwangtungensis	10.5	7.2
CF	9	Pinaceae	Pinus	kwangtungensis	5.4	6.3
CF	9	Pinaceae	Pinus	kwangtungensis	5.5	7
CF	9	Pinaceae	Pinus	kwangtungensis	6.2	7.3
CF	9	Juglandaceae	Platycarya	strobilacea	11.5	8.2
CF	9	Juglandaceae	Platycarya	strobilacea	5.8	5.5
CF	9	Juglandaceae	Platycarya	strobilacea	5.5	4.8
CF	9	Juglandaceae	Platycarya	strobilacea	5.1	4.7
CF	9	Juglandaceae	Platycarya	strobilacea	6	7.5
CF	9	Sapindaceae	Brachystegia	spp	6	7.8
CF	9	Pinaceae	Pinus	kwangtungensis	6.3	5.8
CF	9	Pinaceae	Pinus	kwangtungensis	16.8	9.5
CF	9	Juglandaceae	Platycarya	strobilacea	5.4	6
CF	9	Pinaceae	Pinus	kwangtungensis	12	8.8
CF	9	Pinaceae	Pinus	kwangtungensis	9.3	1.5
CF	9	Pinaceae	Pinus	kwangtungensis	8.2	6.5
CF	9	Pinaceae	Pinus	kwangtungensis	13	4.5
CF	9	Pinaceae	Pinus	kwangtungensis	10.3	4
CF	9	Fagaceae	Quercus	phillyraeoides	6.4	5
CF	9	Fagaceae	Quercus	phillyraeoides	5.5	5
CF	9	Pinaceae	Pinus	kwangtungensis	9.3	4
CF	9	Pinaceae	Pinus	kwangtungensis	5.7	3
CF	9	Juglandaceae	Platycarya	strobilacea	9.6	5
CF	9	Fagaceae	Quercus	phillyraeoides	7.1	4
CF	9	Fagaceae	Quercus	phillyraeoides	5.4	4
CF	9	Pinaceae	Pinus	kwangtungensis	11	5
CF	9	Pinaceae	Pinus	kwangtungensis	6.1	4.5
CF	9	Pinaceae	Pinus	kwangtungensis	7.7	6
CF	9	Pinaceae	Pinus	kwangtungensis	21.2	6
CF	9	Pinaceae	Pinus	kwangtungensis	6.1	4
CF	9	Pinaceae	Pinus	kwangtungensis	10	5
CF	9	Pinaceae	Pinus	kwangtungensis	6.1	4
CF	9	Pinaceae	Pinus	kwangtungensis	13.6	6
CF	9	Pinaceae	Pinus	kwangtungensis	6.1	6
CF	9	Pinaceae	Pinus	kwangtungensis	5.7	4.5
CF	9	Pinaceae	Pinus	kwangtungensis	13.7	5
CF	9	Pinaceae	Pinus	kwangtungensis	9.8	7
CF	9	Pinaceae	Pinus	kwangtungensis	9.1	6.5
CF	9	Fagaceae	Castanopsis	fargesii	8.8	7
CF	9	Fagaceae	Castanopsis	fargesii	7.7	7
CF	9	Fagaceae	Castanopsis	fargesii	7.8	7
CF	9	Fagaceae	Castanopsis	fargesii	7	6.5
CF	9	Fagaceae	Castanopsis	fargesii	7.7	5
CF	9	Fagaceae	Castanopsis	fargesii	7.6	7
CF	9	Fagaceae	Castanopsis	fargesii	5.8	6
CF	9	Fagaceae	Castanopsis	fargesii	6.9	6.5
CF	9	Fagaceae	Castanopsis	fargesii	8.2	5.5
CF	9	Pinaceae	Pinus	kwangtungensis	14.3	5
CF	9	Pinaceae	Pinus	kwangtungensis	9.1	7
CF	9	Pinaceae	Pinus	kwangtungensis	8.1	7
CF	9	Pinaceae	Pinus	kwangtungensis	9.1	7.5
CF	9	Pinaceae	Pinus	kwangtungensis	6.5	4
CF	9	Pinaceae	Pinus	kwangtungensis	11.6	7.5
CF	9	Pinaceae	Pinus	kwangtungensis	7.4	6
CF	9	Pinaceae	Pinus	kwangtungensis	9.8	7
CF	9	Pinaceae	Pinus	kwangtungensis	12.9	6.5
CF	9	Lauraceae	Cinnamomum	Camphora	6.8	4
CF	9	Pinaceae	Pinus	kwangtungensis	9.8	4.5
CF	9	Pinaceae	Pinus	kwangtungensis	10.9	7
CF	9	Pinaceae	Pinus	kwangtungensis	9.8	5
CF	9	Juglandaceae	Platycarya	strobilacea	5.2	7.5
CF	9	Fagaceae	Cyclobalanopsis	glauca	5.2	7
CF	9	Fagaceae	Cyclobalanopsis	glauca	5.1	7.5
CF	9	Pinaceae	Pinus	kwangtungensis	9	3.5
CF	9	Pinaceae	Pinus	kwangtungensis	6.9	3
EDBM	1	Ebenaceae	Diospyros	dumetorum	4	7.1
EDBM	1	Ebenaceae	Diospyros	dumetorum	2.2	5.8
EDBM	1	Juglandaceae	Platycarya	strobilacea	3.2	9
EDBM	1	Sapindaceae	Acer	wangchii	2.1	4.2
EDBM	1	Ebenaceae	Diospyros	dumetorum	2.3	5
EDBM	1	Anacardiaceae	Toxicodendron	succedaneum	4.5	7.2
EDBM	1	Juglandaceae	Platycarya	strobilacea	6.9	10
EDBM	1	Juglandaceae	Platycarya	strobilacea	7.6	8
EDBM	1	Primulaceae	Myrsine	semiserrata	1.4	3.8
EDBM	1	Juglandaceae	Platycarya	strobilacea	5.6	7.8
EDBM	1	Cornaceae	Cornus	parviflora	8.4	6.5
EDBM	1	Cornaceae	Cornus	parviflora	5.8	6.3
EDBM	1	Cornaceae	Cornus	parviflora	6.5	5.5
EDBM	1	Sapindaceae	Boniodendron	minus	2.9	8
EDBM	1	Rutaceae	Clausena	dunniana	13.9	9.1
EDBM	1	Anacardiaceae	Pistacia	chinensis	16.9	12.1
EDBM	1	Anacardiaceae	Pistacia	chinensis	10	8.7
EDBM	1	Meliaceae	Toona	sinensis	8.4	9.5
EDBM	1	Fagaceae	Quercus	myrsinifolia	6.6	6.3
EDBM	1	Fagaceae	Quercus	myrsinifolia	1.5	3.1
EDBM	1	Sapindaceae	Handeliodendron	bodinieri	7.4	6
EDBM	1	Sapindaceae	Handeliodendron	bodinieri	3.5	6.1
EDBM	1	Juglandaceae	Platycarya	strobilacea	5.9	9
EDBM	1	Sapindaceae	Boniodendron	minus	14	13
EDBM	1	Euphorbiaceae	Triadica	rotundifolia	7.4	10
EDBM	1	Anacardiaceae	Pistacia	chinensis	13.5	15
EDBM	1	Rutaceae	Clausena	dunniana	2.4	3
EDBM	1	Rutaceae	Clausena	dunniana	6.2	5
EDBM	1	Fagaceae	Quercus	glauca	3.7	6.8
EDBM	1	Cannabaceae	Pteroceltis	tatarinowii	7.4	10.2
EDBM	1	Euphorbiaceae	Mallotus	philippensis	2.8	6.5
EDBM	1	Anacardiaceae	Pistacia	chinensis	3.1	6.3
EDBM	1	Anacardiaceae	Pistacia	chinensis	2.9	6.5
EDBM	1	Anacardiaceae	Pistacia	chinensis	1.5	6.5
EDBM	1	Anacardiaceae	Pistacia	chinensis	2.1	4.1
EDBM	1	Anacardiaceae	Pistacia	chinensis	2	4
EDBM	1	Anacardiaceae	Toxicodendron	succedaneum	10.5	13.7
EDBM	1	Fagaceae	Quercus	glauca	3.7	5.2
EDBM	1	Fagaceae	Quercus	thorelii	1.5	2.7
EDBM	1	Fagaceae	Quercus	thorelii	6.7	9.3
EDBM	1	Fagaceae	Quercus	thorelii	2	3
EDBM	1	Fagaceae	Quercus	thorelii	1.1	2.5
EDBM	1	Rutaceae	Clausena	dunniana	5	6
EDBM	1	Rutaceae	Clausena	dunniana	3.4	5.8
EDBM	1	Rutaceae	Clausena	dunniana	9.2	10
EDBM	1	Sapindaceae	Acer	wangchii	5.4	7
EDBM	1	Sapindaceae	Acer	wangchii	4.2	7.5
EDBM	1	Lauraceae	Cinnamomum	wilsonii	3.1	6.5
EDBM	1	Sapindaceae	Acer	wangchii	12.4	12
EDBM	1	Sapindaceae	Acer	wangchii	18.2	16.8
EDBM	1	Betulaceae	Carpinus	lipoensis	4	6
EDBM	1	Betulaceae	Carpinus	lipoensis	4.8	6.5
EDBM	1	Betulaceae	Carpinus	lipoensis	4	8.4
EDBM	1	Betulaceae	Carpinus	lipoensis	6.8	4.2
EDBM	1	Fagaceae	Quercus	thorelii	2	4.3
EDBM	1	Fagaceae	Quercus	thorelii	1.4	4.6
EDBM	1	Fagaceae	Quercus	thorelii	2.7	4
EDBM	1	Fagaceae	Quercus	thorelii	1.8	5.6
EDBM	1	Fagaceae	Quercus	glauca	1.2	2.8
EDBM	1	Fagaceae	Quercus	glauca	3.2	5.9
EDBM	1	Cannabaceae	Pteroceltis	tatarinowii	12	16.7
EDBM	1	Sapindaceae	Acer	wangchii	3.9	6.7
EDBM	1	Betulaceae	Carpinus	lipoensis	1.5	3.3
EDBM	1	Sapindaceae	Acer	wangchii	3.3	6.5
EDBM	1	Fagaceae	Quercus	thorelii	9.8	8.2
EDBM	1	Fagaceae	Quercus	thorelii	3.2	6.3
EDBM	1	Rutaceae	Clausena	dunniana	1.5	2.4
EDBM	1	Berberidaceae	Nandina	domestica	1.5	2.6
EDBM	1	Fagaceae	Quercus	glauca	1.4	4.8
EDBM	1	Fagaceae	Quercus	glauca	2.2	4.3
EDBM	1	Juglandaceae	Platycarya	strobilacea	2.4	6
EDBM	1	Ulmaceae	Zelkova	serrata	4.7	8.8
EDBM	1	Fagaceae	Quercus	thorelii	2.7	4.6
EDBM	1	Fagaceae	Quercus	glauca	1.8	3.1
EDBM	1	Fagaceae	Quercus	glauca	7.2	8.3
EDBM	1	Fagaceae	Quercus	glauca	1.6	3.2
EDBM	1	Fagaceae	Quercus	glauca	3.7	5.1
EDBM	1	Fagaceae	Quercus	glauca	2.7	4
EDBM	1	Fagaceae	Quercus	thorelii	2.6	5.3
EDBM	1	Fagaceae	Quercus	glauca	1.6	3.8
EDBM	1	Fagaceae	Quercus	glauca	1.3	3.6
EDBM	1	Ulmaceae	Zelkova	serrata	2.3	5.8
EDBM	1	Ebenaceae	Diospyros	dumetorum	1.4	4.3
EDBM	1	Ebenaceae	Diospyros	dumetorum	5.8	8
EDBM	1	Rutaceae	Murraya	exotica	2.7	4.1
EDBM	1	Fagaceae	Quercus	thorelii	6	7.4
EDBM	1	Juglandaceae	Platycarya	strobilacea	8.2	10.6
EDBM	1	Ebenaceae	Diospyros	dumetorum	1.2	2.6
EDBM	1	Fabaceae	Albizia	kalkora	1.9	3.6
EDBM	1	Fagaceae	Quercus	glauca	3.3	4.2
EDBM	1	Ebenaceae	Diospyros	dumetorum	3.3	1.7
EDBM	1	Sapindaceae	Acer	wangchii	13.3	12
EDBM	1	Ebenaceae	Diospyros	dumetorum	2.5	3
EDBM	1	Ebenaceae	Diospyros	dumetorum	2.8	3
EDBM	1	Ebenaceae	Diospyros	dumetorum	1.4	2.3
EDBM	1	Symplocaceae	Symplocos	adenophylla	2.4	2.8
EDBM	1	Sapindaceae	Acer	wangchii	1	2.1
EDBM	1	Symplocaceae	Symplocos	adenophylla	1.4	1.4
EDBM	1	Symplocaceae	Symplocos	adenophylla	1.6	2
EDBM	1	Fagaceae	Quercus	glauca	2.2	6.1
EDBM	1	Fagaceae	Quercus	glauca	2.6	3.3
EDBM	1	Rutaceae	Clausena	dunniana	4.7	6.8
EDBM	1	Rutaceae	Clausena	dunniana	6.5	5.7
EDBM	1	Cannabaceae	Pteroceltis	tatarinowii	12.5	15.8
EDBM	1	Anacardiaceae	Pistacia	chinensis	12.7	12.3
EDBM	1	Lauraceae	Lindera	communis	21.3	12
EDBM	1	Sapindaceae	Boniodendron	minus	7.3	8
EDBM	1	Rutaceae	Clausena	dunniana	5.6	7
EDBM	1	Rutaceae	Clausena	dunniana	3.2	5.4
EDBM	1	Cornaceae	Cornus	wilsoniana	6.3	10
EDBM	1	Cornaceae	Cornus	wilsoniana	5.4	10
EDBM	1	Cornaceae	Cornus	wilsoniana	5.1	10
EDBM	1	Rubiaceae	Sinoadina	racemosa	6.5	6.5
EDBM	1	Sapindaceae	Boniodendron	minus	8.5	9
EDBM	1	Aquifoliaceae	Ilex	chinensis	1.8	2.5
EDBM	1	Aquifoliaceae	Ilex	chinensis	3	6
EDBM	1	Sapindaceae	Boniodendron	minus	4.2	6
EDBM	1	Fabaceae	Dalbergia	hupeana	13.8	13
EDBM	1	Juglandaceae	Platycarya	strobilacea	15.6	11
EDBM	1	Sapindaceae	Acer	sinense	1.9	4.2
EDBM	1	Pittosporaceae	Pittosporum	glabratum	6.9	7
EDBM	1	Sapindaceae	Acer	sinense	4.5	7.5
EDBM	1	Pittosporaceae	Pittosporum	glabratum	5	6.5
EDBM	1	Fagaceae	Quercus	thorelii	4.7	4
EDBM	1	Fagaceae	Quercus	thorelii	1.9	4.4
EDBM	1	Lauraceae	Cinnamomum	camphora	6.9	9
EDBM	1	Rutaceae	Clausena	dunniana	3.4	7
EDBM	1	Rutaceae	Clausena	dunniana	3.7	5
EDBM	1	Rutaceae	Clausena	dunniana	3.5	5
EDBM	1	Sapindaceae	Boniodendron	minus	2.3	3.1
EDBM	1	Lamiaceae	Callicarpa	bodinieri	2.6	5
EDBM	1	Ulmaceae	Zelkova	serrata	20.5	14
EDBM	1	Adoxaceae	Viburnum	henryi	8.8	8
EDBM	1	Primulaceae	Myrsine	semiserrata	1.2	2.5
EDBM	1	Sapindaceae	Boniodendron	minus	4.3	8
EDBM	1	Juglandaceae	Platycarya	strobilacea	11.8	13.5
EDBM	1	Sapindaceae	Boniodendron	minus	2.2	5
EDBM	1	Sapindaceae	Boniodendron	minus	7.7	14
EDBM	1	Sapindaceae	Boniodendron	minus	6.7	11
EDBM	1	Sapindaceae	Boniodendron	minus	4.1	14
EDBM	1	Sapindaceae	Boniodendron	minus	4.5	6.5
EDBM	1	Sapindaceae	Boniodendron	minus	1.7	3.2
EDBM	1	Juglandaceae	Platycarya	strobilacea	3.2	13
EDBM	1	Anacardiaceae	Toxicodendron	succedaneum	4.1	11
EDBM	1	Fagaceae	Quercus	myrsinifolia	6.2	9
EDBM	1	Fagaceae	Quercus	myrsinifolia	7.9	7.5
EDBM	1	Pittosporaceae	Pittosporum	glabratum	5.5	5.7
EDBM	1	Araliaceae	Dendropanax	dentiger	3	4.6
EDBM	1	Fagaceae	Quercus	myrsinifolia	1.5	1.9
EDBM	1	Cornaceae	Cornus	wilsoniana	5.2	6.5
EDBM	1	Cornaceae	Cornus	wilsoniana	3.5	6.5
EDBM	1	Cornaceae	Cornus	wilsoniana	3.4	6.1
EDBM	1	Adoxaceae	Viburnum	henryi	4.7	5.5
EDBM	1	Rutaceae	Clausena	dunniana	2.5	6
EDBM	1	Rutaceae	Clausena	dunniana	5.2	5.5
EDBM	1	Rutaceae	Clausena	dunniana	3.9	5
EDBM	1	Rutaceae	Clausena	dunniana	1.7	4.5
EDBM	1	Fagaceae	Quercus	glauca	1.8	3.5
EDBM	1	Rutaceae	Clausena	dunniana	1.8	5.4
EDBM	1	Rutaceae	Clausena	dunniana	2.1	4.6
EDBM	1	Fagaceae	Quercus	glauca	2.8	4.8
EDBM	1	Euphorbiaceae	Mallotus	philippensis	2.2	3.5
EDBM	1	Rutaceae	Clausena	dunniana	4.2	5.7
EDBM	1	Juglandaceae	Platycarya	strobilacea	19.7	16
EDBM	1	Pittosporaceae	Pittosporum	glabratum	3.4	5
EDBM	1	Rutaceae	Clausena	dunniana	2.3	4
EDBM	1	Juglandaceae	Platycarya	strobilacea	14.4	16
EDBM	1	Juglandaceae	Platycarya	strobilacea	3.7	6
EDBM	1	Fagaceae	Quercus	glauca	2.4	2
EDBM	1	Rutaceae	Clausena	dunniana	4.9	6.5
EDBM	1	Sapindaceae	Boniodendron	minus	7.7	8
EDBM	1	Sapindaceae	Boniodendron	minus	15.2	14.5
EDBM	1	Ulmaceae	Zelkova	serrata	1.8	3.8
EDBM	1	Ulmaceae	Zelkova	serrata	2.9	4
EDBM	1	Lauraceae	Machilus	japonica	5.6	5.7
EDBM	1	Lauraceae	Machilus	japonica	4.7	4.8
EDBM	1	Sapindaceae	Boniodendron	minus	7.1	8
EDBM	1	Ulmaceae	Zelkova	serrata	1.5	3.5
EDBM	1	Fagaceae	Quercus	thorelii	2.8	3.2
EDBM	1	Lauraceae	Machilus	japonica	1.4	1.5
EDBM	1	Betulaceae	Carpinus	lipoensis	8.5	13
EDBM	1	Betulaceae	Carpinus	lipoensis	10.7	12
EDBM	1	Sapindaceae	Boniodendron	minus	4	5.5
EDBM	1	Fabaceae	Dalbergia	hupeana	15.5	13.5
EDBM	1	Betulaceae	Carpinus	lipoensis	3.5	7
EDBM	1	Betulaceae	Carpinus	lipoensis	2.1	7.5
EDBM	1	Sapindaceae	Boniodendron	minus	13	14.5
EDBM	1	Sapindaceae	Boniodendron	minus	28	18
EDBM	1	Sapindaceae	Boniodendron	minus	2.6	5
EDBM	1	Sapindaceae	Boniodendron	minus	3.8	5.6
EDBM	1	Sapindaceae	Boniodendron	minus	3.1	6
EDBM	1	Sapindaceae	Boniodendron	minus	4.2	6.8
EDBM	1	Rutaceae	Clausena	dunniana	5.4	5
EDBM	1	Rutaceae	Clausena	dunniana	8.8	6
EDBM	1	Rutaceae	Clausena	dunniana	3.4	5.5
EDBM	1	Rutaceae	Clausena	dunniana	4.6	6
EDBM	1	Rutaceae	Clausena	dunniana	4.4	5
EDBM	1	Rutaceae	Clausena	dunniana	3.8	6
EDBM	1	Rutaceae	Clausena	dunniana	4.2	6
EDBM	1	Sapindaceae	Boniodendron	minus	8	9
EDBM	1	Sapindaceae	Boniodendron	minus	11	13.5
EDBM	1	Juglandaceae	Platycarya	strobilacea	14	10
EDBM	1	Rutaceae	Clausena	dunniana	2.3	5.5
EDBM	1	Malvaceae	Firmiana	simplex	5.3	9
EDBM	1	Cornaceae	Cornus	wilsoniana	3	5
EDBM	1	Sapindaceae	Boniodendron	minus	14.4	15
EDBM	1	Cornaceae	Cornus	wilsoniana	3.9	5
EDBM	1	Cornaceae	Cornus	wilsoniana	4.8	10
EDBM	1	Pittosporaceae	Pittosporum	glabratum	2.4	4.3
EDBM	1	Rutaceae	Clausena	dunniana	1.3	2.3
EDBM	1	Rosaceae	Lauro-cerasus	spinulosa	10.3	11.5
EDBM	1	Moraceae	Morus	liboensis	4.5	7.5
EDBM	1	Pittosporaceae	Pittosporum	glabratum	3.9	3.7
EDBM	1	Rutaceae	Clausena	dunniana	5.5	5.9
EDBM	1	Rutaceae	Clausena	dunniana	4.2	7
EDBM	1	Ulmaceae	Zelkova	serrata	3.7	5.5
EDBM	1	Ulmaceae	Zelkova	serrata	15	15
EDBM	1	Anacardiaceae	Toxicodendron	succedaneum	9.9	9.5
EDBM	1	Rutaceae	Clausena	dunniana	4.4	6.5
EDBM	1	Ebenaceae	Diospyros	kaki	12.8	13
EDBM	1	Rutaceae	Clausena	dunniana	6	8
EDBM	1	Rosaceae	Lauro-cerasus	spinulosa	11.4	12
EDBM	1	Ulmaceae	Zelkova	serrata	3.6	6.8
EDBM	1	Lauraceae	Beilschmiedia	kweichowensis	7.6	7.6
EDBM	1	Lauraceae	Beilschmiedia	kweichowensis	9.3	11
EDBM	2	Ulmaceae	Ulmus	castaneifolia	8.1	6.5
EDBM	2	Cannabaceae	Celtis	sinensis	8.5	6.7
EDBM	2	Cannabaceae	Pteroceltis	tatarinowii	20.4	14.3
EDBM	2	Lauraceae	Lindera	communis	1.8	3.4
EDBM	2	Lauraceae	Lindera	communis	1.7	1.5
EDBM	2	Lamiaceae	Vitex	canescens	25.8	19.8
EDBM	2	Anacardiaceae	Toxicodendron	succedaneum	9.8	9.7
EDBM	2	Ulmaceae	Ulmus	castaneifolia	7.1	8.9
EDBM	2	Oleaceae	Fraxinus	insularis	13.2	16.7
EDBM	2	Euphorbiaceae	Mallotus	philippensis	10.9	15.3
EDBM	2	Lauraceae	Lindera	communis	1.1	2.3
EDBM	2	Berberidaceae	Nandina	domestica	1.2	4.3
EDBM	2	Berberidaceae	Nandina	domestica	1.2	4.2
EDBM	2	Berberidaceae	Nandina	domestica	1	3.9
EDBM	2	Berberidaceae	Nandina	domestica	1.9	4.5
EDBM	2	Berberidaceae	Nandina	domestica	1.3	4.2
EDBM	2	Berberidaceae	Nandina	domestica	1.1	4.1
EDBM	2	Euphorbiaceae	Mallotus	philippensis	1.9	2.8
EDBM	2	Berberidaceae	Nandina	domestica	1.3	3.1
EDBM	2	Anacardiaceae	Pistacia	chinensis	19.2	23.2
EDBM	2	Anacardiaceae	Pistacia	chinensis	18.1	21.3
EDBM	2	Anacardiaceae	Pistacia	chinensis	22.5	22.4
EDBM	2	Berberidaceae	Mahonia	fortunei	3.3	4.5
EDBM	2	Berberidaceae	Nandina	domestica	1.4	4.2
EDBM	2	Berberidaceae	Nandina	domestica	1.7	4.5
EDBM	2	Berberidaceae	Nandina	domestica	1.2	3.9
EDBM	2	Sapindaceae	Acer	coriaceifolium	9	15.9
EDBM	2	Berberidaceae	Nandina	domestica	1.2	3.4
EDBM	2	Berberidaceae	Nandina	domestica	1.4	5.7
EDBM	2	Cannabaceae	Celtis	sinensis	17.8	18.9
EDBM	2	Cannabaceae	Celtis	sinensis	1.6	3.4
EDBM	2	Cannabaceae	Celtis	sinensis	1.5	3.4
EDBM	2	Berberidaceae	Nandina	domestica	1.8	3.6
EDBM	2	Berberidaceae	Nandina	domestica	1.3	2.4
EDBM	2	Betulaceae	Carpinus	pubescens	38.5	23.2
EDBM	2	Lauraceae	Beilschmiedia	kweichowensis	9.4	8.9
EDBM	2	Cannabaceae	Pteroceltis	tatarinowii	21.5	18.7
EDBM	2	Ebenaceae	Diospyros	kaki	1.7	3.5
EDBM	2	Lauraceae	Cinnamomum	wilsonii	17.2	15.9
EDBM	2	Lauraceae	Cinnamomum	wilsonii	10	13.2
EDBM	2	Lamiaceae	Vitex	canescens	28	25.6
EDBM	2	Symplocaceae	Symplocos	adenophylla	19.4	15.7
EDBM	2	Cornaceae	Cornus	parviflora	1.1	2.3
EDBM	2	Araliaceae	Dendropanax	dentiger	10.6	8.4
EDBM	2	Ulmaceae	Zelkova	serrata	2.5	4.5
EDBM	2	Cannabaceae	Pteroceltis	tatarinowii	1.8	3.4
EDBM	2	Oleaceae	Fraxinus	insularis	18.4	21.3
EDBM	2	Sapindaceae	Acer	coriaceifolium	21	18
EDBM	2	Sapindaceae	Acer	coriaceifolium	22	18.7
EDBM	2	Sapindaceae	Acer	coriaceifolium	12.6	10.2
EDBM	2	Sapindaceae	Boniodendron	minus	1.4	3.7
EDBM	2	Ebenaceae	Diospyros	dumetorum	6.5	8.7
EDBM	2	Araliaceae	Dendropanax	dentiger	3	3.3
EDBM	2	Sapindaceae	Handeliodendron	bodinieri	1.8	2.6
EDBM	2	Sapindaceae	Handeliodendron	bodinieri	1.5	2.6
EDBM	2	Moraceae	Ficus	pandurata	18.4	9.8
EDBM	2	Moraceae	Ficus	pandurata	13.4	9
EDBM	2	Rutaceae	Clausena	dunniana	8.6	5
EDBM	2	Oleaceae	Fraxinus	insularis	6.6	8.5
EDBM	2	Pittosporaceae	Pittosporum	glabratum	6.9	5.5
EDBM	2	Berberidaceae	Mahonia	fortunei	3.6	4.5
EDBM	2	Berberidaceae	Mahonia	fortunei	2.7	4.5
EDBM	2	Berberidaceae	Nandina	domestica	1.6	3
EDBM	2	Ebenaceae	Diospyros	kaki	16.5	13.5
EDBM	2	Oleaceae	Fraxinus	insularis	15.2	14
EDBM	2	Lauraceae	Lindera	communis	1.6	3
EDBM	2	Ulmaceae	Zelkova	serrata	8.4	11
EDBM	2	Lamiaceae	Callicarpa	giraldii	3.8	5.5
EDBM	2	Ulmaceae	Zelkova	serrata	5	7
EDBM	2	Ulmaceae	Zelkova	serrata	4.3	12
EDBM	2	Betulaceae	Carpinus	pubescens	2.5	3.8
EDBM	2	Adoxaceae	Viburnum	propinquum	5.4	6.5
EDBM	2	Adoxaceae	Viburnum	henryi	1.4	1.8
EDBM	2	Adoxaceae	Viburnum	henryi	5.3	5
EDBM	2	Adoxaceae	Viburnum	propinquum	4.3	2.3
EDBM	2	Adoxaceae	Viburnum	henryi	2	3.5
EDBM	2	Adoxaceae	Viburnum	henryi	4.7	5
EDBM	2	Adoxaceae	Viburnum	henryi	1.7	4.2
EDBM	2	Berberidaceae	Nandina	domestica	2	4.5
EDBM	2	Adoxaceae	Viburnum	henryi	2.7	3.8
EDBM	2	Cannabaceae	Pteroceltis	tatarinowii	2.1	17
EDBM	2	Cannabaceae	Pteroceltis	tatarinowii	19	17
EDBM	2	Sapindaceae	Acer	coriaceifolium	19	16
EDBM	2	Berberidaceae	Nandina	domestica	1.6	1.6
EDBM	2	Berberidaceae	Nandina	domestica	1.7	1.7
EDBM	2	Rutaceae	Clausena	dunniana	7.3	10
EDBM	2	Cannabaceae	Pteroceltis	tatarinowii	17.6	20
EDBM	2	Rutaceae	Clausena	dunniana	8.8	9.8
EDBM	2	Rutaceae	Clausena	dunniana	5.6	7.6
EDBM	2	Rutaceae	Clausena	dunniana	7.6	11
EDBM	2	Rutaceae	Clausena	dunniana	6.4	9
EDBM	2	Rutaceae	Clausena	dunniana	7.4	9.5
EDBM	2	Rutaceae	Clausena	dunniana	5.8	8.8
EDBM	2	Cornaceae	Cornus	wilsoniana	8.3	8.3
EDBM	2	Cornaceae	Cornus	parviflora	7.4	7.4
EDBM	2	Cornaceae	Cornus	wilsoniana	12.7	12.7
EDBM	2	Berberidaceae	Mahonia	fortunei	1.1	1.8
EDBM	2	Berberidaceae	Mahonia	fortunei	1	1.3
EDBM	2	Ulmaceae	Zelkova	serrata	3.1	8.7
EDBM	2	Cannabaceae	Pteroceltis	tatarinowii	21.2	20
EDBM	2	Cannabaceae	Pteroceltis	tatarinowii	18.5	21
EDBM	2	Pittosporaceae	Pittosporum	glabratum	7.2	7.2
EDBM	2	Sapindaceae	Acer	wangchii	3.3	3.3
EDBM	2	Ulmaceae	Ulmus	pumila	19	17
EDBM	2	Sapindaceae	Boniodendron	minus	11.3	8.9
EDBM	2	Adoxaceae	Viburnum	propinquum	1.9	3.8
EDBM	2	Adoxaceae	Viburnum	propinquum	1.6	1.6
EDBM	2	Adoxaceae	Viburnum	propinquum	2.1	2.1
EDBM	2	Adoxaceae	Viburnum	propinquum	2	4.3
EDBM	2	Adoxaceae	Viburnum	propinquum	8.3	3.8
EDBM	2	Adoxaceae	Viburnum	propinquum	2.4	4.2
EDBM	2	Cannabaceae	Pteroceltis	tatarinowii	20	19
EDBM	2	Adoxaceae	Viburnum	propinquum	4.3	5.5
EDBM	2	Adoxaceae	Viburnum	propinquum	4.9	3.8
EDBM	2	Celastraceae	Euonymus	nitidus	3.5	3.2
EDBM	2	Adoxaceae	Viburnum	propinquum	7.4	7.6
EDBM	3	Anacardiaceae	Pistacia	chinensis	1.9	3.2
EDBM	3	Juglandaceae	Platycarya	strobilacea	11.5	16.3
EDBM	3	Linaceae	Tirpitzia	sinensis	7	9.2
EDBM	3	Lauraceae	Lindera	communis	4.4	6.7
EDBM	3	Juglandaceae	Platycarya	strobilacea	4.3	8.9
EDBM	3	Elaeocarpaceae	Elaeocarpus	japonicus	3.4	6.8
EDBM	3	Sapindaceae	Acer	coriaceifolium	1.6	3
EDBM	3	Elaeocarpaceae	Elaeocarpus	japonicus	3.3	6.8
EDBM	3	Pittosporaceae	Pittosporum	glabratum	11	16.7
EDBM	3	Sapindaceae	Acer	wangchii	1.2	3.7
EDBM	3	Fagaceae	Quercus	jenseniana	1	2.1
EDBM	3	Celastraceae	Euonymus	laxiflorus	4.8	7.1
EDBM	3	Celastraceae	Euonymus	laxiflorus	6.6	8.7
EDBM	3	Berberidaceae	Nandina	domestica	1.4	4.2
EDBM	3	Rutaceae	Clausena	dunniana	8.1	7.6
EDBM	3	Sapindaceae	Acer	wangchii	3.1	6.2
EDBM	3	Lauraceae	Machilus	microphylla	9.7	13.5
EDBM	3	Sapindaceae	Acer	wangchii	1.6	3.5
EDBM	3	Sapindaceae	Boniodendron	minus	1	4.2
EDBM	3	Anacardiaceae	Pistacia	chinensis	10.5	10.7
EDBM	3	Rutaceae	Clausena	dunniana	3.8	6.7
EDBM	3	Rutaceae	Clausena	dunniana	4.4	7.4
EDBM	3	Fagaceae	Castanopsis	sclerophylla	1.6	3.7
EDBM	3	Rosaceae	Pyracantha	fortuneana	3.3	9.5
EDBM	3	Juglandaceae	Platycarya	strobilacea	7.9	13.4
EDBM	3	Juglandaceae	Platycarya	strobilacea	4.9	7.7
EDBM	3	Juglandaceae	Platycarya	strobilacea	16.1	19.8
EDBM	3	Lauraceae	Lindera	communis	2.2	5.2
EDBM	3	Lauraceae	Lindera	communis	2.4	6.3
EDBM	3	Juglandaceae	Platycarya	strobilacea	12.8	15.2
EDBM	3	Moraceae	Ficus	pandurata	6.6	8.4
EDBM	3	Lauraceae	Litsea	pungens	2.6	5.2
EDBM	3	Lauraceae	Litsea	pungens	3	7.4
EDBM	3	Cannabaceae	Celtis	sinensis	2.4	4.5
EDBM	3	Juglandaceae	Platycarya	strobilacea	8.3	9.6
EDBM	3	Juglandaceae	Platycarya	strobilacea	6.9	6.7
EDBM	3	Juglandaceae	Platycarya	strobilacea	14.5	19.8
EDBM	3	Celastraceae	Euonymus	nitidus	3.5	7.1
EDBM	3	Lauraceae	Lindera	communis	1.6	4.2
EDBM	3	Lauraceae	Lindera	communis	1.5	4.1
EDBM	3	Juglandaceae	Platycarya	strobilacea	15.2	17.9
EDBM	3	Lauraceae	Machilus	microphylla	14.2	18.7
EDBM	3	Euphorbiaceae	Mallotus	philippensis	6.3	9.3
EDBM	3	Lauraceae	Lindera	communis	1.8	3.6
EDBM	3	Juglandaceae	Platycarya	strobilacea	2.2	4.1
EDBM	3	Sapindaceae	Boniodendron	minus	1.3	7.3
EDBM	3	Sapindaceae	Boniodendron	minus	2.3	6.7
EDBM	3	Lauraceae	Machilus	microphylla	8.6	9.6
EDBM	3	Fagaceae	Quercus	myrsinifolia	1.8	2.8
EDBM	3	Rutaceae	Clausena	dunniana	2.7	5.8
EDBM	3	Betulaceae	Carpinus	pubescens	4.8	7.9
EDBM	3	Fagaceae	Castanopsis	fargesii	7.8	9.8
EDBM	3	Lauraceae	Machilus	microphylla	14.7	13.8
EDBM	3	Lauraceae	Machilus	microphylla	20.1	10.7
EDBM	3	Lauraceae	Machilus	microphylla	7.2	9.7
EDBM	3	Lauraceae	Machilus	microphylla	13.9	14.8
EDBM	3	Lauraceae	Cinnamomum	camphora	4.9	8.4
EDBM	3	Cornaceae	Cornus	wilsoniana	7.5	10.2
EDBM	3	Cornaceae	Cornus	wilsoniana	4.7	8.7
EDBM	3	Ebenaceae	Diospyros	kaki	5.9	9.8
EDBM	3	Juglandaceae	Platycarya	strobilacea	4.1	8.7
EDBM	3	Fagaceae	Quercus	glauca	5.8	8.7
EDBM	3	Aquifoliaceae	Ilex	latifolia	4	8.5
EDBM	3	Anacardiaceae	Toxicodendron	succedaneum	7.2	9.4
EDBM	3	Hamamelidaceae	Distylium	tsiangii	4.2	8.7
EDBM	3	Sapindaceae	Boniodendron	minus	15	18.2
EDBM	3	Sapindaceae	Boniodendron	minus	12.4	16.3
EDBM	3	Sapindaceae	Boniodendron	minus	1.5	1.9
EDBM	3	Sapindaceae	Boniodendron	minus	14.2	16.7
EDBM	3	Fagaceae	Quercus	jenseniana	1.8	3.1
EDBM	3	Fagaceae	Quercus	jenseniana	1.9	2.2
EDBM	3	Sapindaceae	Boniodendron	minus	10.5	13.5
EDBM	3	Lauraceae	Machilus	microphylla	28	23.2
EDBM	3	Hamamelidaceae	Distylium	racemosum	7	9.7
EDBM	3	Lauraceae	Machilus	japonica	9.7	11.7
EDBM	3	Hamamelidaceae	Distylium	tsiangii	10.6	8.1
EDBM	3	Hamamelidaceae	Distylium	racemosum	6	9.3
EDBM	3	Rutaceae	Clausena	dunniana	3.7	4.8
EDBM	3	Betulaceae	Carpinus	turczaninowii	20.3	19.7
EDBM	3	Lauraceae	Machilus	japonica	13	12.7
EDBM	3	Betulaceae	Carpinus	pubescens	36	23.7
EDBM	3	Euphorbiaceae	Mallotus	philippensis	3.8	6.2
EDBM	3	Sapindaceae	Boniodendron	minus	4.1	7.3
EDBM	3	Lauraceae	Machilus	microphylla	13	15.4
EDBM	3	Lauraceae	Cinnamomum	wilsonii	13.8	16
EDBM	3	Lauraceae	Cinnamomum	wilsonii	9.9	10.7
EDBM	3	Ebenaceae	Diospyros	kaki	2.5	5.7
EDBM	3	Lauraceae	Cinnamomum	wilsonii	9.5	11.3
EDBM	3	Anacardiaceae	Toxicodendron	succedaneum	5.6	8.7
EDBM	3	Aquifoliaceae	Ilex	pentagona	8.6	9.2
EDBM	3	Aquifoliaceae	Ilex	pentagona	5.5	6.7
EDBM	3	Betulaceae	Carpinus	pubescens	3.5	5.1
EDBM	3	Rutaceae	Clausena	dunniana	1.5	1.9
EDBM	3	Juglandaceae	Platycarya	strobilacea	4.7	9.6
EDBM	3	Berberidaceae	Mahonia	fortunei	1.7	1.6
EDBM	3	Berberidaceae	Mahonia	fortunei	3.5	3.5
EDBM	3	Juglandaceae	Platycarya	strobilacea	2.6	2.8
EDBM	3	Juglandaceae	Platycarya	strobilacea	2.6	3.8
EDBM	3	Juglandaceae	Platycarya	strobilacea	2.3	3.6
EDBM	3	Lauraceae	Cinnamomum	camphora	2.3	2.7
EDBM	3	Cornaceae	Cornus	parviflora	6.3	7.2
EDBM	3	Lauraceae	Machilus	microcarpa	1.6	3.8
EDBM	3	Cornaceae	Cornus	parviflora	1.8	2.7
EDBM	3	Cornaceae	Cornus	parviflora	8.1	4.8
EDBM	3	Lauraceae	Machilus	microcarpa	2.8	7.8
EDBM	3	Juglandaceae	Platycarya	strobilacea	1.3	4.1
EDBM	3	Lauraceae	Lindera	communis	1.4	1.4
EDBM	3	Lauraceae	Lindera	communis	2	2.1
EDBM	3	Lauraceae	Machilus	nanmu	2.3	2.1
EDBM	3	Lauraceae	Lindera	communis	1.5	2.1
EDBM	3	Juglandaceae	Platycarya	strobilacea	7.4	10.8
EDBM	3	Euphorbiaceae	Mallotus	philippensis	2.2	3.5
EDBM	3	Lauraceae	Lindera	communis	1.2	2.1
EDBM	3	Lauraceae	Lindera	communis	4.1	4.9
EDBM	3	Betulaceae	Carpinus	pubescens	1.9	1.9
EDBM	3	Araliaceae	Kalopanax	septemlobus	12.5	9.8
EDBM	3	Linaceae	Tirpitzia	sinensis	2.1	2.9
EDBM	3	Juglandaceae	Platycarya	strobilacea	2.1	3.2
EDBM	3	Lauraceae	Lindera	communis	1.6	3.2
EDBM	3	Lauraceae	Machilus	nanmu	5	6.5
EDBM	3	Juglandaceae	Platycarya	strobilacea	3.6	4.8
EDBM	3	Anacardiaceae	Choerospondias	axillaris	32.3	25
EDBM	3	Fagaceae	Quercus	glauca	4.7	4.9
EDBM	3	Lauraceae	Lindera	communis	1.8	2.5
EDBM	3	Lauraceae	Lindera	communis	1.4	2.9
EDBM	3	Pittosporaceae	Pittosporum	crispulum	4	4
EDBM	3	Lauraceae	Lindera	communis	1.5	2.2
EDBM	3	Salicaceae	Xylosma	congesta	3.5	3.5
EDBM	3	Lauraceae	Lindera	communis	1.5	2.1
EDBM	3	Betulaceae	Carpinus	pubescens	2.5	4.1
EDBM	3	Lauraceae	Machilus	microcarpa	6.6	7.9
EDBM	3	Cornaceae	Cornus	parviflora	6.9	5.5
EDBM	3	Linaceae	Tirpitzia	sinensis	13.6	14.5
EDBM	3	Lauraceae	Cinnamomum	camphora	11.8	14
EDBM	3	Linaceae	Tirpitzia	sinensis	4.2	6.5
EDBM	3	Lauraceae	Lindera	communis	2.3	2.5
EDBM	3	Rutaceae	Clausena	dunniana	7.5	6.5
EDBM	3	Oleaceae	Osmanthus	yunnanensis	1.5	2.3
EDBM	3	Pittosporaceae	Pittosporum	crispulum	3.2	6.3
EDBM	3	Pittosporaceae	Pittosporum	crispulum	10.3	7.6
EDBM	3	Cornaceae	Cornus	parviflora	5.4	7
EDBM	3	Sapindaceae	Boniodendron	minus	21.5	23.5
EDBM	3	Sapindaceae	Boniodendron	minus	14.6	27
EDBM	3	Ebenaceae	Diospyros	dumetorum	2.1	4.7
EDBM	3	Celastraceae	Euonymus	alatus	6.7	4.3
EDBM	3	Euphorbiaceae	Mallotus	philippensis	1.4	1.8
EDBM	3	Lauraceae	Machilus	microcarpa	14.4	21
EDBM	3	Lauraceae	Machilus	microcarpa	14.4	21
EDBM	3	Lauraceae	Machilus	microcarpa	14.7	23
EDBM	3	Ebenaceae	Diospyros	dumetorum	1.5	2.5
EDBM	3	Ebenaceae	Diospyros	dumetorum	2.5	3.5
EDBM	3	Sapindaceae	Boniodendron	minus	15.7	12
EDBM	3	Rutaceae	Clausena	dunniana	6.2	5.2
EDBM	3	Sapindaceae	Boniodendron	minus	6.2	5.2
EDBM	3	Sapindaceae	Boniodendron	minus	8.3	9
EDBM	3	Celastraceae	Euonymus	laxiflorus	5.5	4.2
EDBM	3	Sapindaceae	Handeliodendron	bodinieri	4.5	4.5
EDBM	3	Cornaceae	Cornus	parviflora	3.3	4.5
EDBM	3	Pittosporaceae	Pittosporum	crispulum	2.7	1.7
EDBM	3	Lauraceae	Machilus	microphylla	18.7	23
EDBM	3	Salicaceae	Bennettiodendron	leprosipes	5.1	7.1
EDBM	3	Malvaceae	Reevesia	glaucophylla	6.4	8
EDBM	3	Pittosporaceae	Pittosporum	glabratum	1.3	2
EDBM	3	Lauraceae	Cinnamomum	wilsonii	8	7
EDBM	3	Lauraceae	Cinnamomum	wilsonii	10.6	17
EDBM	3	Cornaceae	Cornus	wilsoniana	19.3	11
EDBM	3	Lauraceae	Machilus	microcarpa	10.7	8.1
EDBM	3	Rutaceae	Clausena	dunniana	5.5	8.1
EDBM	3	Lauraceae	Machilus	microcarpa	8.8	7.8
EDBM	3	Elaeocarpaceae	Sloanea	sinensis	10.9	9.1
EDBM	3	Elaeocarpaceae	Sloanea	sinensis	3.4	2.8
EDBM	3	Elaeocarpaceae	Sloanea	sinensis	8.9	5.9
EDBM	3	Elaeocarpaceae	Sloanea	sinensis	2.8	2.6
EDBM	3	Elaeocarpaceae	Sloanea	sinensis	7	6.1
EDBM	3	Lauraceae	Machilus	nanmu	2	2.3
EDBM	3	Fagaceae	Castanopsis	fargesii	4.8	7.2
EDBM	3	Salicaceae	Bennettiodendron	leprosipes	3	3.3
EDBM	3	Salicaceae	Bennettiodendron	leprosipes	6.5	5.5
EDBM	3	Salicaceae	Bennettiodendron	leprosipes	5	4
EDBM	3	Lauraceae	Machilus	microcarpa	18.4	20
EDBM	3	Salicaceae	Bennettiodendron	leprosipes	1.5	2.3
EDBM	3	Salicaceae	Bennettiodendron	leprosipes	3.7	3.5
EDBM	3	Salicaceae	Bennettiodendron	leprosipes	2.9	4.1
EDBM	3	Salicaceae	Bennettiodendron	leprosipes	2	3
EDBM	3	Salicaceae	Bennettiodendron	leprosipes	3.8	3.2
EDBM	3	Sapindaceae	Boniodendron	minus	7.9	10
EDBM	3	Sapindaceae	Boniodendron	minus	7	4.5
EDBM	3	Juglandaceae	Platycarya	strobilacea	9.4	14
EDBM	3	Rutaceae	Clausena	dunniana	1.5	2.1
EDBM	3	Fagaceae	Quercus	glauca	2.5	3.1
EDBM	3	Lauraceae	Lindera	communis	5.1	6.1
EDBM	3	Cornaceae	Cornus	parviflora	2.1	2.8
EDBM	3	Pittosporaceae	Pittosporum	glabratum	3.2	3.2
EDBM	3	Cornaceae	Cornus	wilsoniana	3.9	4.3
EDBM	3	Araliaceae	Dendropanax	dentiger	2.1	2.7
EDBM	4	Celastraceae	Euonymus	laxiflorus	1.5	2.1
EDBM	4	Celastraceae	Euonymus	laxiflorus	1.5	2.2
EDBM	4	Celastraceae	Euonymus	laxiflorus	1.3	2
EDBM	4	Celastraceae	Euonymus	nitidus	11.3	8.8
EDBM	4	Celastraceae	Euonymus	laxiflorus	4.5	3.5
EDBM	4	Lamiaceae	Vitex	canescens	18.2	13.6
EDBM	4	Anacardiaceae	Pistacia	chinensis	25.1	16
EDBM	4	Ebenaceae	Diospyros	kaki	20.8	16.1
EDBM	4	Ebenaceae	Diospyros	kaki	26.2	15.8
EDBM	4	Lauraceae	Machilus	chuanchienensis	9.7	8.5
EDBM	4	Rhamnaceae	Hovenia	acerba	26	15.6
EDBM	4	Lamiaceae	Callicarpa	giraldii	5	7.5
EDBM	4	Pittosporaceae	Pittosporum	glabratum	12.6	9.8
EDBM	4	Celastraceae	Euonymus	laxiflorus	1.8	1.7
EDBM	4	Elaeocarpaceae	Elaeocarpus	japonicus	4.1	6.5
EDBM	4	Lamiaceae	Vitex	canescens	19.1	11.2
EDBM	4	Berberidaceae	Nandina	domestica	1.6	2.5
EDBM	4	Berberidaceae	Nandina	domestica	1.2	2.5
EDBM	4	Celastraceae	Euonymus	laxiflorus	2.5	3.5
EDBM	4	Celastraceae	Euonymus	nitidus	11.3	5.1
EDBM	4	Rutaceae	Clausena	dunniana	5	4.3
EDBM	4	Celastraceae	Euonymus	laxiflorus	11.1	4.8
EDBM	4	Celastraceae	Euonymus	nitidus	4.6	4.1
EDBM	4	Euphorbiaceae	Croton	tiglium	9.6	20.8
EDBM	4	Berberidaceae	Mahonia	fortunei	2.7	3.4
EDBM	4	Berberidaceae	Mahonia	fortunei	3.3	3.3
EDBM	4	Berberidaceae	Mahonia	fortunei	1.6	3.6
EDBM	4	Berberidaceae	Mahonia	fortunei	2.4	2.1
EDBM	4	Berberidaceae	Nandina	domestica	2.2	2.1
EDBM	4	Ebenaceae	Diospyros	kaki	22.3	14.6
EDBM	4	Linaceae	Tirpitzia	sinensis	5	6.7
EDBM	4	Ebenaceae	Diospyros	kaki	24.7	15.5
EDBM	4	Berberidaceae	Nandina	domestica	2.5	4
EDBM	4	Berberidaceae	Nandina	domestica	1.5	2.3
EDBM	4	Ebenaceae	Diospyros	kaki	4.2	3.8
EDBM	4	Ebenaceae	Diospyros	kaki	6.3	8.2
EDBM	4	Pittosporaceae	Pittosporum	glabratum	4.3	7.1
EDBM	4	Anacardiaceae	Toxicodendron	succedaneum	12.1	9.8
EDBM	4	Celastraceae	Euonymus	nitidus	10.8	6.4
EDBM	4	Ebenaceae	Diospyros	kaki	16.9	10.5
EDBM	4	Lauraceae	Machilus	japonica	6.1	5.7
EDBM	4	Rhamnaceae	Hovenia	acerba	27	12.2
EDBM	4	Lauraceae	Machilus	japonica	2.8	4.5
EDBM	4	Lauraceae	Machilus	japonica	13.7	9.5
EDBM	4	Lauraceae	Machilus	japonica	1.3	2.6
EDBM	4	Celastraceae	Euonymus	laxiflorus	7.6	7.2
EDBM	4	Ebenaceae	Diospyros	kaki	10	11
EDBM	4	Ebenaceae	Diospyros	kaki	23.8	12
EDBM	4	Pittosporaceae	Pittosporum	glabratum	9.5	8.3
EDBM	4	Adoxaceae	Viburnum	brachybotryum	6	4.5
EDBM	4	Adoxaceae	Viburnum	brachybotryum	4.3	5.9
EDBM	4	Adoxaceae	Viburnum	brachybotryum	4.4	5
EDBM	4	Adoxaceae	Viburnum	brachybotryum	4.5	6.1
EDBM	4	Adoxaceae	Viburnum	brachybotryum	6.6	5.5
EDBM	4	Cornaceae	Cornus	parviflora	11.8	9.8
EDBM	4	Cornaceae	Cornus	parviflora	12.6	9
EDBM	4	Adoxaceae	Viburnum	brachybotryum	7.1	7
EDBM	4	Cornaceae	Cornus	parviflora	8.8	8.2
EDBM	4	Cornaceae	Cornus	parviflora	1.4	3.2
EDBM	4	Cornaceae	Cornus	parviflora	9.2	9
EDBM	4	Berberidaceae	Nandina	domestica	1.8	4.2
EDBM	4	Cornaceae	Cornus	parviflora	3.4	7.1
EDBM	4	Cornaceae	Cornus	parviflora	9.9	8.6
EDBM	4	Cornaceae	Cornus	parviflora	4.7	6.8
EDBM	4	Sapindaceae	Eurycorymbus	cavaleriei	16	10.3
EDBM	4	Pittosporaceae	Pittosporum	glabratum	15.4	12.5
EDBM	4	Adoxaceae	Viburnum	propinquum	7.5	8.2
EDBM	4	Adoxaceae	Viburnum	propinquum	5.1	8
EDBM	4	Oleaceae	Fraxinus	insularis	2.7	3.3
EDBM	4	Rosaceae	Lauro-cerasus	spinulosa	8.5	8.7
EDBM	4	Rosaceae	Lauro-cerasus	spinulosa	10.9	7.9
EDBM	4	Sapindaceae	Acer	wangchii	16.5	10.1
EDBM	4	Sapindaceae	Acer	wangchii	13.2	8.4
EDBM	4	Sapindaceae	Acer	wangchii	6.1	8.6
EDBM	4	Sapindaceae	Acer	wangchii	4.4	8.7
EDBM	4	Rosaceae	Lauro-cerasus	spinulosa	26.9	11.2
EDBM	4	Rosaceae	Lauro-cerasus	spinulosa	12.4	12.8
EDBM	4	Moraceae	Morus	liboensis	15.7	8.8
EDBM	4	Cornaceae	Cornus	parviflora	9.6	9.2
EDBM	4	Lauraceae	Lindera	communis	2	3.8
EDBM	4	Lauraceae	Lindera	communis	1.4	2.2
EDBM	4	Lauraceae	Lindera	communis	1.1	1.6
EDBM	4	Ebenaceae	Diospyros	kaki	26.1	12
EDBM	4	Cornaceae	Cornus	parviflora	5.6	10.1
EDBM	4	Sapindaceae	Acer	wangchii	3.1	2.3
EDBM	4	Sapindaceae	Boniodendron	minus	1	4.3
EDBM	4	Sapindaceae	Eurycorymbus	cavaleriei	19.1	8.6
EDBM	4	Sapindaceae	Eurycorymbus	cavaleriei	19.6	8
EDBM	4	Sapindaceae	Acer	wangchii	5.1	7
EDBM	4	Rubiaceae	Sinoadina	racemosa	1.9	5.5
EDBM	4	Rubiaceae	Sinoadina	racemosa	2.2	4.5
EDBM	4	Lauraceae	Litsea	pungens	18.6	9.7
EDBM	4	Berberidaceae	Nandina	domestica	1.6	4.5
EDBM	4	Berberidaceae	Nandina	domestica	2	3.6
EDBM	4	Cornaceae	Cornus	parviflora	7.4	10
EDBM	4	Berberidaceae	Mahonia	fortunei	1.7	2.5
EDBM	4	Berberidaceae	Mahonia	fortunei	3.3	3
EDBM	4	Berberidaceae	Mahonia	fortunei	1.8	2.5
EDBM	4	Lauraceae	Lindera	communis	2.4	4.1
EDBM	4	Lauraceae	Lindera	communis	1.2	2.3
EDBM	4	Lauraceae	Lindera	communis	1.4	1.8
EDBM	4	Rutaceae	Clausena	dunniana	7.4	7.5
EDBM	4	Sapindaceae	Acer	wangchii	3.4	4.5
EDBM	4	Cornaceae	Cornus	parviflora	7.8	7.6
EDBM	4	Cornaceae	Cornus	parviflora	4.3	6.6
EDBM	4	Cornaceae	Cornus	parviflora	7.1	6.7
EDBM	4	Cornaceae	Cornus	parviflora	8.9	7.6
EDBM	4	Cornaceae	Cornus	parviflora	9	5.8
EDBM	4	Sapindaceae	Eurycorymbus	cavaleriei	21.4	9.3
EDBM	5	Pittosporaceae	Pittosporum	crispulum	9.3	11.8
EDBM	5	Rhamnaceae	Rhamnus	napalensis	1.7	2.9
EDBM	5	Anacardiaceae	Toxicodendron	succedaneum	15	15.3
EDBM	5	Rosaceae	Pyracantha	loureiroi	1.2	4.2
EDBM	5	Rosaceae	Pyracantha	loureiroi	5.6	9.2
EDBM	5	Ulmaceae	Zelkova	serrata	7.7	10.8
EDBM	5	Fagaceae	Quercus	thorelii	4	7.8
EDBM	5	Stemonuraceae	Gomphandra	tetrandra	1.8	2.9
EDBM	5	Euphorbiaceae	Croton	tiglium	1.3	1.7
EDBM	5	Juglandaceae	Platycarya	strobilacea	9.5	12.2
EDBM	5	Euphorbiaceae	Croton	tiglium	1.8	2.6
EDBM	5	Sapindaceae	Acer	wangchii	2.3	5.4
EDBM	5	Stemonuraceae	Gomphandra	tetrandra	1.4	2.4
EDBM	5	Stemonuraceae	Gomphandra	tetrandra	1.4	2.1
EDBM	5	Sapindaceae	Acer	wangchii	1.2	2
EDBM	5	Stemonuraceae	Gomphandra	tetrandra	2	2.3
EDBM	5	Stemonuraceae	Gomphandra	tetrandra	1.7	2.5
EDBM	5	Fagaceae	Quercus	glauca	7.4	8.8
EDBM	5	Stemonuraceae	Gomphandra	tetrandra	1.5	3
EDBM	5	Stemonuraceae	Gomphandra	tetrandra	1.4	2.5
EDBM	5	Annonaceae	Miliusa	balansae	2.5	3.4
EDBM	5	Stemonuraceae	Gomphandra	tetrandra	3.5	5.7
EDBM	5	Stemonuraceae	Gomphandra	tetrandra	2	3.1
EDBM	5	Stemonuraceae	Gomphandra	tetrandra	2.2	3.1
EDBM	5	Stemonuraceae	Gomphandra	tetrandra	1.9	2.9
EDBM	5	Hamamelidaceae	Distylium	myricoides	2.1	3.8
EDBM	5	Annonaceae	Miliusa	balansae	1.2	1.5
EDBM	5	Aquifoliaceae	Ilex	macrocarpa	2.7	2.3
EDBM	5	Annonaceae	Miliusa	balansae	11.3	11.2
EDBM	5	Pittosporaceae	Pittosporum	glabratum	5.9	6.5
EDBM	5	Betulaceae	Carpinus	lipoensis	15.2	13.4
EDBM	5	Fagaceae	Quercus	jenseniana	3.7	8.5
EDBM	5	Rosaceae	Photinia	beauverdiana	1.9	2.2
EDBM	5	Lauraceae	Machilus	ichangensis	1.6	2.7
EDBM	5	Rutaceae	Clausena	dunniana	6.9	6.4
EDBM	5	Fagaceae	Quercus	glauca	6.8	8.1
EDBM	5	Celastraceae	Euonymus	nitidus	7.9	8.1
EDBM	5	Sapindaceae	Boniodendron	minus	6.1	9.2
EDBM	5	Araliaceae	Kalopanax	septemlobus	7.5	8.2
EDBM	5	Fagaceae	Quercus	myrsinifolia	15.2	13.1
EDBM	5	Fagaceae	Quercus	myrsinifolia	8.8	7.4
EDBM	5	Buxaceae	Buxus	megistophylla	4.8	6.2
EDBM	5	Fagaceae	Castanopsis	carlesii	1.3	2.8
EDBM	5	Juglandaceae	Platycarya	strobilacea	28.1	16.3
EDBM	5	Rosaceae	Photinia	beauverdiana	1.3	3.5
EDBM	5	Juglandaceae	Platycarya	strobilacea	5.7	10.2
EDBM	5	Sapindaceae	Acer	wangchii	5.7	6.1
EDBM	5	Sapindaceae	Acer	wangchii	9	9.7
EDBM	5	Euphorbiaceae	Mallotus	philippensis	1.6	3.1
EDBM	5	Cannabaceae	Celtis	sinensis	4.2	8.4
EDBM	5	Lauraceae	Cinnamomum	wilsonii	19.5	18.7
EDBM	5	Sapindaceae	Acer	wangchii	14.7	9.8
EDBM	5	Cornaceae	Cornus	wilsoniana	5.4	7.2
EDBM	5	Cornaceae	Cornus	elliptica	13.2	12.5
EDBM	5	Lauraceae	Cinnamomum	wilsonii	10.5	10.2
EDBM	5	Cornaceae	Cornus	hongkongensis	2.5	4.8
EDBM	5	Fabaceae	Albizia	kalkora	1.8	4.4
EDBM	5	Cornaceae	Cornus	elliptica	7.1	7.2
EDBM	5	Sapindaceae	Boniodendron	minus	25.2	15.3
EDBM	5	Ebenaceae	Diospyros	dumetorum	2.3	4.5
EDBM	5	Cornaceae	Cornus	elliptica	6.8	6.7
EDBM	5	Moraceae	Ficus	variegata	2.6	5.2
EDBM	5	Moraceae	Ficus	variegata	12	11.4
EDBM	5	Buxaceae	Buxus	megistophylla	3.8	5.2
EDBM	5	Cannabaceae	Celtis	timorensis	10.5	9.6
EDBM	5	Lauraceae	Lindera	communis	1.7	3.4
EDBM	5	Cannabaceae	Celtis	sinensis	10.1	12.1
EDBM	5	Sapindaceae	Acer	wangchii	5	5.6
EDBM	5	Sapindaceae	Acer	wangchii	17.2	12.3
EDBM	5	Sapindaceae	Acer	wangchii	6.7	8.7
EDBM	5	Sapindaceae	Acer	wangchii	7.1	8.4
EDBM	5	Sapindaceae	Acer	wangchii	10.5	7.3
EDBM	5	Sapindaceae	Acer	wangchii	6.6	8.4
EDBM	5	Sapindaceae	Acer	wangchii	4.5	5.2
EDBM	5	Sapindaceae	Acer	longipes	4.4	6.3
EDBM	5	Sapindaceae	Acer	wangchii	3.4	4.1
EDBM	5	Pittosporaceae	Pittosporum	glabratum	11	10
EDBM	5	Betulaceae	Carpinus	pubescens	28.7	25
EDBM	5	Anacardiaceae	Pistacia	chinensis	20.8	22
EDBM	5	Betulaceae	Carpinus	pubescens	45	24
EDBM	5	Betulaceae	Carpinus	pubescens	15	20
EDBM	5	Pittosporaceae	Pittosporum	crispulum	5.5	4.7
EDBM	5	Sapindaceae	Acer	wangchii	1.8	3
EDBM	5	Sapindaceae	Acer	wangchii	3.1	2.3
EDBM	5	Sapindaceae	Acer	wangchii	8.4	20
EDBM	5	Oleaceae	Fraxinus	insularis	3.2	10
EDBM	5	Sapindaceae	Acer	wangchii	10.7	12
EDBM	5	Phyllanthaceae	Bridelia	retusa	9	14
EDBM	5	Berberidaceae	Mahonia	fortunei	1.2	2.1
EDBM	5	Sapindaceae	Handeliodendron	bodinieri	12	10
EDBM	5	Sapindaceae	Handeliodendron	bodinieri	17.1	10
EDBM	5	Arecaceae	Rhapis	excelsa	2.8	2.7
EDBM	5	Stemonuraceae	Gomphandra	tetrandra	2.2	4.5
EDBM	5	Stemonuraceae	Gomphandra	tetrandra	2.2	2.4
EDBM	5	Stemonuraceae	Gomphandra	tetrandra	2.4	2.3
EDBM	5	Sapindaceae	Acer	wangchii	8.9	14
EDBM	5	Ulmaceae	Zelkova	serrata	14.6	17
EDBM	5	Stemonuraceae	Gomphandra	tetrandra	2.7	3.3
EDBM	5	Stemonuraceae	Gomphandra	tetrandra	1.8	2.2
EDBM	5	Stemonuraceae	Gomphandra	tetrandra	1.6	2.3
EDBM	5	Stemonuraceae	Gomphandra	tetrandra	2.7	2.8
EDBM	5	Arecaceae	Rhapis	excelsa	1.9	2.2
EDBM	5	Arecaceae	Rhapis	excelsa	2.1	4.3
EDBM	5	Arecaceae	Rhapis	excelsa	3	3.1
EDBM	5	Buxaceae	Buxus	megistophylla	1.2	1.9
EDBM	5	Annonaceae	Miliusa	balansae	2.2	3.2
EDBM	5	Rutaceae	Clausena	dunniana	13.4	16
EDBM	5	Rutaceae	Clausena	dunniana	5.3	5.6
EDBM	5	Rutaceae	Clausena	dunniana	9.2	12
EDBM	5	Betulaceae	Carpinus	pubescens	13	24
EDBM	5	Betulaceae	Carpinus	pubescens	13	24
EDBM	5	Betulaceae	Carpinus	pubescens	9	23
EDBM	5	Anacardiaceae	Toxicodendron	succedaneum	2.1	3
EDBM	5	Sapindaceae	Acer	wangchii	5	7
EDBM	5	Sapindaceae	Acer	wangchii	8.5	16
EDBM	5	Sapindaceae	Acer	wangchii	7.8	9.5
EDBM	5	Betulaceae	Carpinus	pubescens	12.7	18
EDBM	5	Betulaceae	Carpinus	pubescens	15.4	21
EDBM	5	Betulaceae	Carpinus	pubescens	14	18
EDBM	5	Rosaceae	Lauro-cerasus	zippeliana	10.5	13
EDBM	5	Rosaceae	Lauro-cerasus	zippeliana	13.5	22
EDBM	5	Sapindaceae	Boniodendron	minus	2.1	2.2
EDBM	5	Celastraceae	Euonymus	nitidus	2.9	7.5
EDBM	5	Celastraceae	Euonymus	nitidus	3.5	7.3
EDBM	5	Celastraceae	Euonymus	nitidus	3.5	6.7
EDBM	5	Sapindaceae	Boniodendron	minus	18.2	26
EDBM	5	Sapotaceae	Sinosideroxylon	pedunculatum	11.4	20
EDBM	5	Rosaceae	Eriobotrya	japonica	1.5	2.2
EDBM	5	Ulmaceae	Zelkova	serrata	16.2	13
EDBM	5	Sapindaceae	Acer	wangchii	4	7
EDBM	5	Stemonuraceae	Gomphandra	tetrandra	1.2	1.4
EDBM	5	Stemonuraceae	Gomphandra	tetrandra	2.2	3
EDBM	5	Stemonuraceae	Gomphandra	tetrandra	1.5	1.4
EDBM	5	Stemonuraceae	Gomphandra	tetrandra	17.8	3.5
EDBM	5	Juglandaceae	Platycarya	strobilacea	20.7	26
EDBM	5	Juglandaceae	Platycarya	strobilacea	29.7	26
EDBM	5	Sapindaceae	Acer	wangchii	7.3	12
EDBM	5	Sapindaceae	Acer	wangchii	8.5	13
EDBM	5	Euphorbiaceae	Mallotus	philippensis	4	5.3
EDBM	5	Sapindaceae	Acer	wangchii	6.3	12
EDBM	5	Sapindaceae	Boniodendron	minus	15	26
EDBM	5	Buxaceae	Buxus	henryi	11.5	2.3
EDBM	5	Celastraceae	Euonymus	nitidus	7.7	8.9
EDBM	5	Rubiaceae	Metadina	trichotoma	7.6	9.5
EDBM	5	Celastraceae	Euonymus	nitidus	9.4	7
EDBM	5	Rubiaceae	Metadina	trichotoma	9	13
EDBM	5	Pittosporaceae	Pittosporum	glabratum	1.6	3.2
EDBM	5	Pittosporaceae	Pittosporum	glabratum	1.5	3.3
EDBM	5	Buxaceae	Buxus	megistophylla	4	5.6
EDBM	5	Euphorbiaceae	Triadica	rotundifolia	11	21
EDBM	5	Lauraceae	Machilus	ichangensis	3.1	5
EDBM	6	Euphorbiaceae	Croton	tiglium	1.3	3.1
EDBM	6	Sapindaceae	Acer	wangchii	1.8	2.5
EDBM	6	Rubiaceae	Tarennoidea	wallichii	6.2	8.2
EDBM	6	Celastraceae	Euonymus	laxiflorus	1.2	2.2
EDBM	6	Sapindaceae	Acer	wangchii	1	1.9
EDBM	6	Ulmaceae	Ulmus	pumila	9	11.5
EDBM	6	Rosaceae	Eriobotrya	japonica	1.8	3.5
EDBM	6	Ebenaceae	Diospyros	dumetorum	3	2.6
EDBM	6	Betulaceae	Carpinus	lipoensis	39.5	29
EDBM	6	Celastraceae	Euonymus	nitidus	11.5	4.1
EDBM	6	Moraceae	Ficus	variegata	6.5	9.8
EDBM	6	Ulmaceae	Ulmus	pumila	14	12
EDBM	6	Lauraceae	Lindera	communis	2.2	3.9
EDBM	6	Sapindaceae	Acer	wangchii	2.2	4.5
EDBM	6	Pittosporaceae	Pittosporum	glabratum	9.1	8.1
EDBM	6	Cannabaceae	Pteroceltis	tatarinowii	9	12
EDBM	6	Sapindaceae	Acer	wangchii	13.3	13.4
EDBM	6	Ebenaceae	Diospyros	dumetorum	1.8	3.6
EDBM	6	Sapindaceae	Acer	wangchii	2.3	2.3
EDBM	6	Juglandaceae	Platycarya	strobilacea	19	17.1
EDBM	6	Sapindaceae	Acer	wangchii	4.5	6.8
EDBM	6	Juglandaceae	Platycarya	strobilacea	18.5	14
EDBM	6	Malvaceae	Firmiana	simplex	7	9.1
EDBM	6	Sapindaceae	Acer	wangchii	3	4.5
EDBM	6	Sapindaceae	Acer	wangchii	6	8.8
EDBM	6	Sapindaceae	Acer	wangchii	12.2	15
EDBM	6	Sapindaceae	Acer	wangchii	17.5	13.4
EDBM	6	Sapindaceae	Acer	wangchii	2	3.8
EDBM	6	Lauraceae	Lindera	communis	1.5	2.1
EDBM	6	Sapindaceae	Acer	wangchii	3.5	4.1
EDBM	6	Lamiaceae	Callicarpa	giraldii	2.6	6
EDBM	6	Sapindaceae	Boniodendron	minus	5.1	6.5
EDBM	6	Ebenaceae	Diospyros	kaki	14	9.3
EDBM	6	Ebenaceae	Diospyros	kaki	11.2	8.4
EDBM	6	Celastraceae	Euonymus	laxiflorus	9.7	7.1
EDBM	6	Sapindaceae	Acer	wangchii	3.4	2.3
EDBM	6	Anacardiaceae	Pistacia	chinensis	16.9	15.8
EDBM	6	Sapindaceae	Acer	wangchii	11.9	6.3
EDBM	6	Sapindaceae	Acer	wangchii	6.3	11
EDBM	6	Sapindaceae	Acer	wangchii	19.8	24
EDBM	6	Sapindaceae	Acer	wangchii	11.2	8.9
EDBM	6	Anacardiaceae	Choerospondias	axillaris	45.7	31
EDBM	6	Rutaceae	Clausena	dunniana	10.1	6.8
EDBM	6	Ebenaceae	Diospyros	dumetorum	1.5	1.6
EDBM	6	Sapindaceae	Boniodendron	minus	4.4	7.4
EDBM	6	Sapindaceae	Boniodendron	minus	21.4	22
EDBM	6	Sapindaceae	Acer	wangchii	13.7	13.2
EDBM	6	Sapindaceae	Acer	wangchii	9.8	7.2
EDBM	6	Sapindaceae	Acer	wangchii	5.1	6.8
EDBM	6	Sapindaceae	Acer	wangchii	1.5	1.9
EDBM	6	Sapindaceae	Acer	wangchii	1.1	1.5
EDBM	6	Moraceae	Ficus	variegata	1.2	1.9
EDBM	6	Sapindaceae	Acer	wangchii	1.5	3.2
EDBM	6	Juglandaceae	Platycarya	strobilacea	38.1	25
EDBM	6	Lauraceae	Cinnamomum	wilsonii	16.7	13
EDBM	6	Lauraceae	Cinnamomum	wilsonii	14.5	9
EDBM	6	Celastraceae	Euonymus	nitidus	6.7	9
EDBM	6	Celastraceae	Euonymus	nitidus	3.8	3.4
EDBM	6	Celastraceae	Euonymus	nitidus	7.2	7.2
EDBM	6	Cannabaceae	Celtis	sinensis	8.9	9.8
EDBM	6	Ebenaceae	Diospyros	kaki	12.8	9.8
EDBM	6	Lauraceae	Lindera	pulcherrima	6.6	8.9
EDBM	6	Rutaceae	Clausena	dunniana	6.2	3.8
EDBM	6	Lauraceae	Lindera	pulcherrima	15.8	8.9
EDBM	6	Berberidaceae	Mahonia	fortunei	1.2	2.5
EDBM	6	Berberidaceae	Mahonia	fortunei	1.4	5.8
EDBM	6	Berberidaceae	Mahonia	fortunei	6.3	5.8
EDBM	6	Rosaceae	Eriobotrya	japonica	4.1	6.7
EDBM	6	Euphorbiaceae	Croton	tiglium	4.6	4.7
EDBM	6	Arecaceae	Rhapis	excelsa	1.5	2
EDBM	6	Euphorbiaceae	Mallotus	philippensis	1.3	2.5
EDBM	6	Betulaceae	Carpinus	lipoensis	25.5	15.7
EDBM	6	Lamiaceae	Vitex	canescens	8.7	8.9
EDBM	6	Lamiaceae	Vitex	canescens	8.9	9.3
EDBM	6	Lamiaceae	Vitex	canescens	13.8	11.7
EDBM	6	Sapindaceae	Acer	wangchii	9	8.7
EDBM	6	Sapindaceae	Acer	wangchii	6	6.9
EDBM	6	Sapindaceae	Acer	wangchii	8.5	10.1
EDBM	6	Sapindaceae	Acer	wangchii	2.4	3.9
EDBM	6	Moraceae	Ficus	variegata	1.8	4.2
EDBM	6	Elaeocarpaceae	Elaeocarpus	japonicus	18.5	16.3
EDBM	6	Elaeocarpaceae	Elaeocarpus	japonicus	14.8	14.2
EDBM	6	Sapindaceae	Boniodendron	minus	1	4.2
EDBM	6	Rutaceae	Clausena	dunniana	11	13.7
EDBM	6	Sapindaceae	Boniodendron	minus	3.9	6.9
EDBM	6	Sapindaceae	Boniodendron	minus	2	5.4
EDBM	6	Sapindaceae	Boniodendron	minus	4.4	6.4
EDBM	6	Sapindaceae	Boniodendron	minus	1.5	5.9
EDBM	6	Sapindaceae	Boniodendron	minus	6	8.4
EDBM	6	Cannabaceae	Celtis	sinensis	6.2	7.7
EDBM	6	Rutaceae	Clausena	dunniana	8	7.5
EDBM	6	Ulmaceae	Ulmus	pumila	9.7	8.1
EDBM	6	Juglandaceae	Platycarya	strobilacea	19.8	19
EDBM	6	Juglandaceae	Platycarya	strobilacea	26.5	21
EDBM	6	Euphorbiaceae	Mallotus	philippensis	5.6	5.2
EDBM	6	Betulaceae	Carpinus	pubescens	12.9	7.8
EDBM	6	Rutaceae	Clausena	dunniana	15.3	7.1
EDBM	6	Sapindaceae	Boniodendron	minus	7.6	8
EDBM	6	Sapindaceae	Boniodendron	minus	22.4	22
EDBM	6	Pittosporaceae	Pittosporum	glabratum	8.3	4.7
EDBM	6	Sapindaceae	Boniodendron	minus	10.2	10
EDBM	6	Celastraceae	Euonymus	laxiflorus	5.4	4.8
EDBM	6	Sapindaceae	Boniodendron	minus	20.8	23
EDBM	6	Celastraceae	Euonymus	nitidus	1	4.1
EDBM	6	Celastraceae	Euonymus	nitidus	8.2	5.2
EDBM	6	Betulaceae	Carpinus	pubescens	12.4	9
EDBM	6	Cornaceae	Cornus	wilsoniana	6.4	8
EDBM	6	Sapindaceae	Boniodendron	minus	2	4.8
EDBM	6	Sapindaceae	Handeliodendron	bodinieri	4.8	3.5
EDBM	6	Sapindaceae	Handeliodendron	bodinieri	21.5	11
EDBM	6	Juglandaceae	Platycarya	strobilacea	23	15
EDBM	6	Juglandaceae	Platycarya	strobilacea	24	14
EDBM	6	Sapindaceae	Handeliodendron	bodinieri	1.2	2.7
EDBM	6	Euphorbiaceae	Triadica	rotundifolia	13.8	12.2
EDBM	7	Betulaceae	Carpinus	londoniana	2.6	3.8
EDBM	7	Sapindaceae	Acer	coriaceifolium	10	11
EDBM	7	Lauraceae	Machilus	microcarpa	25.6	15
EDBM	7	Celastraceae	Euonymus	alatus	4.4	4.5
EDBM	7	Lauraceae	Machilus	microcarpa	23.3	16
EDBM	7	Cornaceae	Cornus	parviflora	5.8	4.5
EDBM	7	Fagaceae	Quercus	glauca	8.9	8
EDBM	7	Annonaceae	Miliusa	balansae	3.9	4.5
EDBM	7	Annonaceae	Miliusa	balansae	1.9	3.5
EDBM	7	Lauraceae	Machilus	microcarpa	6.7	9
EDBM	7	Sapindaceae	Acer	wangchii	6.9	6.3
EDBM	7	Lauraceae	Beilschmiedia	kweichowensis	2.7	4.6
EDBM	7	Celastraceae	Euonymus	alatus	4.9	5.5
EDBM	7	Elaeocarpaceae	Elaeocarpus	japonicus	1.3	3.7
EDBM	7	Annonaceae	Miliusa	balansae	2.8	2
EDBM	7	Moraceae	Ficus	variegata	6.3	6.3
EDBM	7	Lauraceae	Machilus	microcarpa	9.6	12
EDBM	7	Annonaceae	Miliusa	balansae	2.6	4.4
EDBM	7	Hamamelidaceae	Distylium	myricoides	1.6	4
EDBM	7	Betulaceae	Carpinus	londoniana	2.3	3.7
EDBM	7	Hamamelidaceae	Distylium	myricoides	2.4	3.5
EDBM	7	Phyllanthaceae	Bridelia	retusa	6.7	5
EDBM	7	Oleaceae	Ligustrum	expansum	11	9.5
[truncated: 321 more rows]
