# Supplementary material for: Stochastic process drives the dissimilarity in biodiversity patterns between Pinus kwangtungensis coniferous forest and evergreen deciduous broad-leaved mixed forest in karst area
Source: PeerJ. 2024 Aug 30;12:e17899. doi: 10.7717/peerj.17899 (PMC11368079; doi:10.7717/peerj.17899)
Supplement: File S2 [file peerj-12-17899-s002.xlsx]

## Sheet: CF
Types	Number	Species	Relative density (%)	Relative significance (%)	Relative frequency (%)	IV
CF	1	Pinus kwangtungensis	0.375235	0.844792	0.0708661	0.430298
CF	2	Platycarya strobilacea	0.199812	0.0564178	0.0708661	0.109032
CF	3	Quercus phillyreoides	0.075985	0.0138205	0.0629921	0.0509325
CF	4	Carpinus lipoensis	0.0572233	0.0102537	0.0551181	0.040865
CF	5	Cyclobalanopsis glauca	0.0384615	0.00817037	0.0629921	0.0365413
CF	6	Acer sycopseoides	0.0300188	0.00598938	0.0472441	0.0277507
CF	7	Castanopsis fargesii	0.0225141	0.00624894	0.0393701	0.022711
CF	8	Carpinus pubescens	0.0253283	0.00982773	0.023622	0.0195927
CF	9	Cyclobalanopsis myrsinifolia	0.0196998	0.00456824	0.0314961	0.018588
CF	10	Loropetalum chinense	0.0225141	0.00344297	0.023622	0.0165264
CF	11	Boniodendron minius	0.011257	0.00388172	0.023622	0.0129203
CF	12	Pittosporum glabratum	0.00375234	0.000674073	0.0314961	0.0119742
CF	13	Michelia martini	0.00938086	0.00218077	0.023622	0.0117279
CF	14	Photinia tushanensis	0.00750469	0.00142196	0.023622	0.0108496
CF	15	Euscaphis japonica	0.0065666	0.00148775	0.023622	0.0105588
CF	16	Ulmus castaneifolia	0.0140713	0.00850253	0.00787402	0.0101493
CF	17	Lithocarpus glaber	0.00562852	0.00116171	0.023622	0.0101374
CF	18	Sinosideroxylon pedunculatum	0.00562852	0.00101751	0.023622	0.0100894
CF	19	Triadica rotundifolia	0.00375234	0.00222232	0.023622	0.00986557
CF	20	Cinnamomum camphora	0.00281426	0.000891739	0.023622	0.00910935
CF	21	Tirpitzia sinensis	0.00281426	0.000577709	0.023622	0.00900467
CF	22	Picrasma quassioides	0.00844278	0.00125616	0.015748	0.00848232
CF	23	Clausena dunniana	0.00469043	0.000885104	0.015748	0.00710786
CF	24	Machilus microcarpa	0.00281426	0.000912339	0.015748	0.00649154
CF	25	Itoa orientalis	0.00281426	0.000761591	0.015748	0.00644129
CF	26	Calocedrus rupestris	0.00281426	0.000437369	0.015748	0.00633322
CF	27	Elaeocarpus sylvestris	0.00187617	0.000583998	0.015748	0.0060694
CF	28	Ficus irisana	0.00187617	0.000515259	0.015748	0.00604649
CF	29	Symplocos sumuntia	0.00187617	0.000248457	0.015748	0.00595755
CF	30	Quercus fooningensis	0.00844278	0.00129394	0.00787402	0.00587024
CF	31	Machilus ichangensis	0.00562852	0.00124359	0.00787402	0.00491537
CF	32	Celtis sinensis	0.00375234	0.000858042	0.00787402	0.00416147
CF	33	Dendropanax dentiger	0.00187617	0.00037995	0.00787402	0.00337671
CF	34	Boniodendron minus	0.00187617	0.000378172	0.00787402	0.00337612
CF	35	Broussonetia papyrifera	0.000938086	0.000375092	0.00787402	0.0030624
CF	36	Pinus massoniana	0.000938086	0.00034352	0.00787402	0.00305187
CF	37	Toxicodendron vernicifluum	0.000938086	0.000298764	0.00787402	0.00303696
CF	38	Ficus microcarpa	0.000938086	0.000270662	0.00787402	0.00302759
CF	39	Ilex ficoidea	0.000938086	0.000250495	0.00787402	0.00302087
CF	40	Quercus jenseniana	0.000938086	0.000200535	0.00787402	0.00300421
CF	41	Taxus wallichiana	0.000938086	0.000200535	0.00787402	0.00300421
CF	42	Itea chinensis	0.000938086	0.000177637	0.00787402	0.00299658
CF	43	Sinoadina racemosa	0.000938086	0.000166708	0.00787402	0.00299294
CF	44	Brachystegia spp	0.000938086	0.000156126	0.00787402	0.00298941
CF	45	Meliosma henryi	0.000938086	0.000145891	0.00787402	0.002986
CF	46	Elaeocarpus decipiens	0.000938086	0.000108421	0.00787402	0.00297351

## Sheet: EDMB
Types	Numbers	Species	Relative density (%)	Relative significance (%)	Relative frequency (%)	IV
EDBM	1	Boniodendron minus	0.0566188	0.0952236	0.0230548	0.0582991
EDBM	2	Acer wangchii	0.0717703	0.0551067	0.0259366	0.0509379
EDBM	3	Platycarya strobilacea	0.0398724	0.0869377	0.0172911	0.0480337
EDBM	4	Clausena dunniana	0.0542265	0.0259836	0.0230548	0.0344216
EDBM	5	Carpinus pubescens	0.0143541	0.0630126	0.0115274	0.0296313
EDBM	6	Pteroceltis tatarinowii	0.0167464	0.0472235	0.0172911	0.027087
EDBM	7	Cornus parviflora	0.0350877	0.0205606	0.0201729	0.0252737
EDBM	8	Diospyros kaki	0.0143541	0.042511	0.0144092	0.0237581
EDBM	9	Lindera communis	0.0374801	0.00644452	0.0230548	0.0223264
EDBM	10	Pistacia chinensis	0.0143541	0.0318377	0.0201729	0.0221215
EDBM	11	Viburnum henryi	0.0350877	0.00925054	0.0144092	0.0195825
EDBM	12	Zelkova serrata	0.0175439	0.0161021	0.0172911	0.016979
EDBM	13	Machilus microcarpa	0.0119617	0.0296232	0.00864553	0.0167435
EDBM	14	Machilus japonica	0.0151515	0.0156199	0.0172911	0.0160208
EDBM	15	Euonymus laxiflorus	0.0199362	0.0119455	0.0144092	0.0154303
EDBM	16	Carpinus lipoensis	0.0103668	0.0241401	0.0115274	0.0153448
EDBM	17	Ulmus pumila	0.00877193	0.0227564	0.0144092	0.0153125
EDBM	18	Cinnamomum wilsonii	0.0103668	0.0170936	0.0172911	0.0149172
EDBM	19	Pittosporum glabratum	0.0167464	0.0103157	0.0172911	0.0147844
EDBM	20	Nandina domestica	0.0287081	0.00078912	0.0144092	0.0146355
EDBM	21	Diospyros dumetorum	0.0183413	0.00177815	0.0230548	0.0143914
EDBM	22	Cornus wilsoniana	0.0151515	0.00908067	0.0172911	0.0138411
EDBM	23	Handeliodendron bodinieri	0.0103668	0.0132937	0.0172911	0.0136505
EDBM	24	Castanopsis sclerophylla	0.030303	0.00113758	0.00864553	0.013362
EDBM	25	Triadica rotundifolia	0.00558214	0.0171778	0.0172911	0.0133503
EDBM	26	Euonymus nitidus	0.0143541	0.00846595	0.0144092	0.0124097
EDBM	27	Acer coriaceifolium	0.00797448	0.0176684	0.0115274	0.0123901
EDBM	28	Toxicodendron succedaneum	0.0103668	0.00865629	0.0172911	0.0121047
EDBM	29	Vitex canescens	0.00558214	0.0216895	0.00864553	0.0119724
EDBM	30	Quercus glauca	0.0207337	0.00362649	0.0115274	0.0119625
EDBM	31	Choerospondias axillaris	0.0015949	0.0272686	0.00576369	0.0115424
EDBM	32	Mallotus philippensis	0.0111643	0.00268351	0.0201729	0.0113402
EDBM	33	Gomphandra tetrandra	0.0239234	0.00390633	0.00576369	0.0111978
EDBM	34	Machilus microphylla	0.00797448	0.0220944	0.00288184	0.0109836
EDBM	35	Quercus thorelii	0.0167464	0.00680029	0.00864553	0.0107307
EDBM	36	Mahonia fortunei	0.0143541	0.00118886	0.0144092	0.00998405
EDBM	37	Elaeocarpus japonicus	0.00877193	0.00661614	0.0144092	0.00993243
EDBM	38	Carpinus londoniana	0.00239234	0.0215257	0.00576369	0.00989389
EDBM	39	Lauro-cerasus spinulosa	0.00558214	0.0147031	0.00864553	0.00964358
EDBM	40	Viburnum propinquum	0.0127592	0.00366541	0.0115274	0.00931732
EDBM	41	Celtis sinensis	0.00717703	0.00554604	0.0115274	0.00808348
EDBM	42	Miliusa balansae	0.0127592	0.0018364	0.00864553	0.00774704
EDBM	43	Beilschmiedia kweichowensis	0.00558214	0.00405156	0.0115274	0.00705369
EDBM	44	Prunus mume	0.000797448	0.0167803	0.00288184	0.00681987
EDBM	45	Bennettiodendron leprosipes	0.0103668	0.00144493	0.00864553	0.0068191
EDBM	46	Fraxinus insularis	0.00478469	0.00700856	0.00864553	0.00681293
EDBM	47	Callicarpa giraldii	0.00398724	0.00109273	0.0144092	0.0064964
EDBM	48	Quercus myrsinifolia	0.00637959	0.00401073	0.00864553	0.00634528
EDBM	49	Eurycorymbus cavaleriei	0.00318979	0.0127378	0.00288184	0.00626981
EDBM	50	Croton tiglium	0.00478469	0.00158773	0.0115274	0.0059666
EDBM	51	Hovenia acerba	0.0015949	0.0122334	0.00288184	0.00557005
EDBM	52	Acer buergerianum	0.00797448	0.00269387	0.00576369	0.00547735
EDBM	53	Ficus variegata	0.00558214	0.00208394	0.00864553	0.00543721
EDBM	54	Quercus jenseniana	0.00558214	0.000390424	0.00864553	0.0048727
EDBM	55	Distylium tsiangii	0.00717703	0.0013381	0.00576369	0.00475961
EDBM	56	Ficus pandurata	0.00239234	0.00489057	0.00576369	0.00434887
EDBM	57	Dendropanax dentiger	0.00318979	0.00117345	0.00864553	0.00433626
EDBM	58	Cinnamomum cassia	0.00478469	0.00237798	0.00576369	0.00430879
EDBM	59	Pittosporum crispulum	0.00478469	0.00223214	0.00576369	0.00426017
EDBM	60	Neolitsea confertifolia	0.00318979	0.00366445	0.00576369	0.00420598
EDBM	61	Symplocos adenophylla	0.00318979	0.00336649	0.00576369	0.00410666
EDBM	62	Eriobotrya japonica	0.00318979	0.000411843	0.00864553	0.00408239
EDBM	63	Tirpitzia sinensis	0.00398724	0.00244677	0.00576369	0.0040659
EDBM	64	Litsea pungens	0.00239234	0.00314951	0.00576369	0.00376852
EDBM	65	Cinnamomum camphora	0.00318979	0.00188203	0.00576369	0.00361184
EDBM	66	Viburnum dilatatum	0.00637959	0.00147419	0.00288184	0.00357854
EDBM	67	Castanopsis carlesii	0.0015949	0.00309213	0.00576369	0.00348357
EDBM	68	Ilex pentagona	0.00239234	0.00216118	0.00576369	0.00343907
EDBM	69	Grona heterocarpos	0.00239234	0.00503137	0.00288184	0.00343519
EDBM	70	Rhapis excelsa	0.00398724	0.000236048	0.00576369	0.00332899
EDBM	71	Machilus nanmu	0.00318979	0.00100384	0.00576369	0.00331911
EDBM	72	Morus liboensis	0.0015949	0.00232252	0.00576369	0.00322703
EDBM	73	Viburnum brachybotryum	0.00478469	0.00163753	0.00288184	0.00310136
EDBM	74	Bridelia retusa	0.00239234	0.00111085	0.00576369	0.00308896
EDBM	75	Kalopanax septemlobus	0.0015949	0.00185025	0.00576369	0.00306961
EDBM	76	Sloanea sinensis	0.00398724	0.00231973	0.00288184	0.00306294
EDBM	77	Euonymus alatus	0.00239234	0.000768484	0.00576369	0.00297484
EDBM	78	Sinoadina racemosa	0.00239234	0.000441447	0.00576369	0.00286583
EDBM	79	Distylium myricoides	0.00239234	0.000110841	0.00576369	0.00275562
EDBM	80	Dalbergia hupeana	0.0015949	0.00375004	0.00288184	0.00274226
EDBM	81	Firmiana simplex	0.0015949	0.000671226	0.00576369	0.0026766
EDBM	82	Toona sinensis	0.0015949	0.000649197	0.00576369	0.00266926
EDBM	83	Cornus elliptica	0.00239234	0.00235865	0.00288184	0.00254428
EDBM	84	Ilex latifolia	0.0015949	0.000170745	0.00576369	0.00250978
EDBM	85	Cornus hongkongensis	0.0015949	0.000138094	0.00576369	0.00249889
EDBM	86	Murraya exotica	0.0015949	8.30652e-05	0.00576369	0.00248055
EDBM	87	Albizia kalkora	0.0015949	5.96433e-05	0.00576369	0.00247274
EDBM	88	Carpinus turczaninowii	0.000797448	0.00358809	0.00288184	0.00242246
EDBM	89	Lindera pulcherrima	0.0015949	0.00255291	0.00288184	0.00234322
EDBM	90	Lauro-cerasus zippeliana	0.0015949	0.00254681	0.00288184	0.00234118
EDBM	91	Buxus megistophylla	0.00318979	0.000478191	0.00288184	0.00218328
EDBM	92	Metadina trichotoma	0.0015949	0.00120819	0.00288184	0.00189498
EDBM	93	Carya kweichowensis	0.00239234	0.000226209	0.00288184	0.00183347
EDBM	94	Ulmus castaneifolia	0.0015949	0.00101019	0.00288184	0.00182898
EDBM	95	Morus alba	0.00239234	9.65612e-05	0.00288184	0.00179025
EDBM	96	Aesculus chinensis	0.0015949	0.000864436	0.00288184	0.00178039
EDBM	97	Distylium racemosum	0.0015949	0.000740099	0.00288184	0.00173895
EDBM	98	Castanopsis fargesii	0.0015949	0.000730347	0.00288184	0.0017357
EDBM	99	Buxus henryi	0.000797448	0.00115151	0.00288184	0.00161027
EDBM	100	Sinosideroxylon pedunculatum	0.000797448	0.00113157	0.00288184	0.00160362
EDBM	101	Pyracantha loureiroi	0.0015949	0.000285591	0.00288184	0.00158744
EDBM	102	Ligustrum expansum	0.000797448	0.00105355	0.00288184	0.00157762
EDBM	103	Acer sinense	0.0015949	0.00020775	0.00288184	0.0015615
EDBM	104	Celtis timorensis	0.000797448	0.000959952	0.00288184	0.00154641
EDBM	105	Ilex chinensis	0.0015949	0.000106574	0.00288184	0.00152777
EDBM	106	Machilus ichangensis	0.0015949	0.000105965	0.00288184	0.00152757
EDBM	107	Miliusa sinensis	0.0015949	5.54639e-05	0.00288184	0.00151073
EDBM	108	Photinia beauverdiana	0.0015949	4.61474e-05	0.00288184	0.00150763
EDBM	109	Myrsine semiserrata	0.0015949	2.9604e-05	0.00288184	0.00150211
EDBM	110	Machilus chuanchienensis	0.000797448	0.000819246	0.00288184	0.00149951
EDBM	111	Euonymus dielsianus	0.000797448	0.000476798	0.00288184	0.00138536
EDBM	112	Photinia prunifolia	0.000797448	0.000356641	0.00288184	0.00134531
EDBM	113	Reevesia glaucophylla	0.000797448	0.000356641	0.00288184	0.00134531
EDBM	114	Tarennoidea wallichii	0.000797448	0.000334699	0.00288184	0.001338
EDBM	115	Machilus rehderi	0.000797448	0.000209056	0.00288184	0.00129612
EDBM	116	Acer longipes	0.000797448	0.000168568	0.00288184	0.00128262
EDBM	117	Litsea coreana	0.000797448	0.00012573	0.00288184	0.00126834
EDBM	118	Styrax japonicus	0.000797448	0.000112843	0.00288184	0.00126405
EDBM	119	Xylosma congesta	0.000797448	0.000106661	0.00288184	0.00126198
EDBM	120	Pyracantha fortuneana	0.000797448	9.48198e-05	0.00288184	0.00125804
EDBM	121	Ilex macrocarpa	0.000797448	6.34744e-05	0.00288184	0.00124759
EDBM	122	Callicarpa bodinieri	0.000797448	5.88596e-05	0.00288184	0.00124605
EDBM	123	Gleditsia sinensis	0.000797448	4.21421e-05	0.00288184	0.00124048
EDBM	124	Debregeasia orientalis	0.000797448	3.83981e-05	0.00288184	0.00123923
EDBM	125	Rhamnus napalensis	0.000797448	2.51634e-05	0.00288184	0.00123482
EDBM	126	Vitex negundo	0.000797448	2.51634e-05	0.00288184	0.00123482
EDBM	127	Osmanthus yunnanensis	0.000797448	1.95909e-05	0.00288184	0.00123296
EDBM	128	Bischofia javanica	0.000797448	1.25381e-05	0.00288184	0.00123061
